# Supplementary material for: Redesigning a General Education Science Course to Promote Critical Thinking
Source: Atypon-hosted journal article supplement (doi:10.1187/cbe.15-02-0032), 2015-08-01
Supplement: combinedsupmats.pdf [file combinedsupmats.pdf]

# Supplemental Material

*CBE—Life Sciences Education*

Rowe *et al.*

1 **SUPPLEMENTAL MATERIAL**

2  
3 **1. Expanded Course Rationale and Structure**

4  
5 Jon D. Miller, the Director of the International Center for the Advancement of Scientific  
6 Literacy, wrote, “the healthy functioning of democracy depends crucially upon the  
7 existence of a literate public; and in modern industrial societies, true democracy must  
8 embrace scientific literacy (Miller, 1998). We share this concern, as the lack of scientific  
9 literacy adversely affects our ability, as a society, to make informed decisions about  
10 science-related issues (Impey et al., 2012) such as global climate change, loss of  
11 biodiversity, resource use, and the efficacy of vaccines. And, as discussed in the main  
12 article, this situation also makes it difficult for people to judge the merits of well-  
13 established scientific theories, including the Theory of Evolution and the Big Bang  
14 Theory.

15  
16 In order to address these issues, the Foundations of Science (FoS) course was designed to  
17 focus on the development of critical thinking skills and basic scientific literacy defined –  
18 consistent with Miller’s definition – as understanding key scientific terminology,  
19 concepts, and theories and, most importantly, understanding science as a reliable way of  
20 knowing about the natural world based on its use of critical thinking and logical  
21 arguments, empirical evidence, skepticism, the scientific method, objectivity/intellectual  
22 honesty, and peer review. This approach, as well as other aspects of the course design  
23 discussed below, is also consistent with the recommendations put forward by the AAAS  
24 in its Project 2061 (American Association for the Advancement of Science, 1993;  
25 Rutherford and Ahlgren, 1990), which was developed to establish recommendations for  
26 science literacy in the U.S.

27  
28  
29 Nature of Science

30  
31 Part of the rationale for developing an integrated science course, and one which addresses  
32 science as a way of knowing, was the recognition that, if students take only two required  
33 science courses in college, they will necessarily graduate with gaping holes in their  
34 knowledge of science because they will have learned little or nothing of the key ideas in  
35 the science disciplines that were not included in their coursework.

36  
37 In addition, because undergraduate science courses typically do not address the nature of  
38 science and scientific reasoning, students will not develop an understanding of the  
39 rationale for the scientific method *as a means of reducing or eliminating error*, nor will  
40 they develop their scientific reasoning skills and their ability to apply them to real-world  
41 situations. Nor will they will be able to distinguish good science from ‘bad’ science, or  
42 real science from pseudoscience.

43  
44 The fact that most Gen-Ed science courses do not address these concepts leaves graduates  
45 unprepared to make informed decisions regarding science-related issues, and it makes it  
46 far more likely they will reject well-supported theories in science. As evidenced by the

47 rise of an anti-vaccine ‘movement’ in the U.S. and elsewhere, they may also reject the  
48 well-established efficacy of vaccines and the health benefits afforded by them. Lacking  
49 an understanding of the scientific methods by which medicines are tested for safety and  
50 efficacy, and placing higher confidence in anecdotal accounts, many people abandon  
51 thoroughly researched medical practices and treatments in favor of untested and even  
52 harmful ‘alternative medicines’ and practices. In short, there are numerous indicators  
53 that people are implicitly rejecting the validity of the scientific method itself. This anti-  
54 science attitude has profoundly negative implications and consequences for society as  
55 shown by the outbreak of whooping cough in the U.S. in 2012. More than 11,000 cases  
56 were reported to the CDC, at least 12 of which were fatal. This was the largest number of  
57 cases reported in the last 50 years (Rosenau, 2012). This outbreak of an entirely  
58 preventable disease occurred because parents rejected the scientific basis of vaccines and  
59 chose not to have their children vaccinated.

60

61 The critical thinking/scientific-reasoning framework of the course is encapsulated, as we  
62 discussed in the paper, in a set of questions Bernstein et al. (2006) suggest be asked when  
63 evaluating a claim. James Lett (1990) expanded those questions into a more formalized  
64 set of rules known by the acronym FiLCHeRS, a framework we find particularly useful  
65 for helping students distinguish science from pseudoscience. The easily assimilated  
66 acronym (once students understand what it means to be *filched*) stands for Falsifiability,  
67 Logic, Comprehensiveness of evidence, Honesty (as in ‘intellectual honesty’),  
68 Replication of research, and Sufficiency of evidence, respectively. Every claim and  
69 theory in the course, both scientific and pseudoscientific, is evaluated using Lett’s rules.  
70 Our repeated use of the framework provides students with a systematic, coherent method  
71 for analyzing claims. They quickly learn to spot pseudoscientific claims because such  
72 claims violate many of the rules, while good scientific claims do not. In short, Lett’s  
73 framework provides a compelling demonstration of the reliability of the scientific  
74 method. Step-by-incremental step, we try to expand the students’ latitudes of acceptance  
75 (see sections on SJT in the main manuscript and also below) by helping them understand  
76 the power of science as a way of knowing.

77

78

### 79 Critical Thinking

80

81 In order to think critically, the student must first know what critical thinking is and value  
82 it as an essential component of informed decision-making. They also must understand at  
83 least some of the ways in which critical thinking can be subverted based on biases,  
84 misperceptions, faulty memory, and cognitive dissonance so that they can avoid these  
85 sources of error. For this reason, the lecture and lab include discussions and activities  
86 that directly demonstrate limits in the accuracy of our students’ own perceptions and  
87 memories. These activities are not only engaging, but they vividly demonstrate the  
88 unreliability of anecdotal testimony and, by inference, the need for the scientific method.

89

90 Ultimately, any hypothesis or theory in science is based on an argument; therefore, it is  
91 essential for students to understand the structure of an argument (premises and  
92 conclusion), the characteristics of a valid and sound deductive argument, and the

93 characteristics of a reasonable, or sound, inductive argument. Therefore, as discussed in  
94 the main article, we do something that is unique in a science course, but which is  
95 fundamentally important to the success of the course; namely, we include a discussion of  
96 arguments, as well as common heuristics and logical fallacies. Very few college students  
97 are aware of what an argument is, or of heuristics and fallacies, prior to taking the course,  
98 and few students would be exposed to them outside of a philosophy course; yet, an  
99 understanding and awareness of them is essential to critical thinking and to the evaluation  
100 of claims. Because the reliability of science as a way of knowing rests to a large degree  
101 on the arguments it makes, students must understand what constitutes a good argument;  
102 i.e., they must understand the necessity of having good reasons for either accepting or  
103 rejecting a claim, which is based on an argument.  
104

105 An example of this is provided by the argument we use to establish the multi-billion year  
106 age of the universe. This argument is discussed in the section of the course dealing with  
107 astronomy and the Big Bang Theory.  
108

- 109 1) Premise 1: We can see galaxies located more than 13 billion light years away.
- 110 2) Premise 2: By definition, it takes light one year to travel a distance of one-light  
111 year.
- 112 3) Conclusion: The universe must be at least 13 billion years old in order for light to  
113 have reached us from galaxies located 13 billion lights years away.  
114

115 Our students, having learned about arguments, can now recognize this is a valid and  
116 sound argument, and so it is reasonable for them to conclude that the universe really is  
117 billions of years old. Had they not learned about arguments, this conclusion might  
118 otherwise carry little weight and its conclusion be dismissed as mere opinion.  
119

120

## 121 Pseudoscience

122

123 One of the most important aspects of the course is that students are asked to use what  
124 they have learned in the course, both scientific facts and critical thinking concepts, to  
125 evaluate a variety of unsupported and/or pseudoscientific claims. The need to include  
126 such extraordinary claims derives from the readily observable fact that the media  
127 bombards people with such claims on a daily basis – yet most people, including college  
128 graduates, lack the scientific knowledge and critical thinking skills to evaluate them  
129 (Johnson and Pigliucci, 2004). Consequently, many people uncritically accept them, as  
130 happened recently when the *Animal Planet* channel ran two pseudo-documentaries on the  
131 alleged existence of mermaids. The second documentary was the most watched show in  
132 the history of the channel, with about 3.6 million viewers (Day, 2013). By incorporating  
133 pseudoscientific and extraordinary claims into the course, and using scientific facts, laws  
134 of nature, and critical thinking skills taught in the course, students gain real-world  
135 experience in using this information to rationally evaluate claims – and they learn science  
136 in the process. This is consistent with an approach advocated by Martin (1994) who  
137 argued that science teachers should include pseudoscience in their courses, not for  
138 purposes of teaching it, but to help students learn to distinguish science from

139 pseudoscience and to critically evaluate claims. Were students taught science in this  
140 manner, and armed with critical thinking skills as part of their science education, few  
141 would fall for the sorts of claims presented in the mermaid pseudo-documentary – or for  
142 a host of other pseudoscientific claims that permeate our culture.

143  
144 The evaluation of the pseudoscientific claim regarding the Loch Ness monster (Rowe,  
145 2015) was mentioned in the main article. Another example concerns the evaluation of  
146 claims pertaining to astrology which, according to SEI 2014 (National Science  
147 Foundation, 2014), 42% of Americans believe is either “sort of scientific” (32%) or “very  
148 scientific (10%). Prior to the discussion of this topic, students first learn relevant  
149 astronomy pertaining to stars, galaxies, and interstellar distances. They also learn about  
150 the four fundamental forces of nature. Using this information, students can then begin to  
151 evaluate the claim that a mere 200 stars, out of about 200 billion in our galaxy, somehow  
152 exert – through means that defy scientific understanding of the universe – an effect on the  
153 personalities of people and their lives based on the position of these stars (and planets) at  
154 the time of their birth. By learning about the fundamental forces of nature (of which  
155 there are only four and no more), students realize that the strong and weak nuclear forces  
156 could not exert such an effect because their range is limited to the nucleus of an atom,  
157 and that both the gravitational and electromagnetic force are too weak – at those distances  
158 – to produce a biological effect. Indeed, they calculate that the doctor standing next to a  
159 mother at the time of her child’s birth exerts a gravitational force millions of times  
160 greater than does the nearest star. And, even if these two forces do have the ability to  
161 ‘reach’ a person, students are asked to consider the related question of how, exactly, it  
162 would affect personality and/or control a person’s future? What is the proposed  
163 mechanism? As students learn in the course, pseudoscience never offers a plausible,  
164 observable, or testable mechanism to explain how alleged extraordinary or paranormal  
165 phenomena are supposed to occur. In contrast, scientific explanations require that such a  
166 mechanism be offered.

167  
168

### 169 Critical Thinking and Psychological Factors Affecting the Acceptance of Ideas

170

171 Students also learn relevant psychology pertaining to the reasons why people may believe  
172 astrology and other extraordinary claims are true even when there is no objective  
173 evidence for them. In the case of astrology, the specific psychological factor that is  
174 addressed is the Forer Effect (also called the Barnum Effect); i.e., the tendency of people  
175 to think a general statement which applies to most anyone (such as that in a horoscope)  
176 appears to apply exclusively to them. This combination of knowledge and analysis  
177 enables students to understand that astrology is pseudoscience, but in the process of  
178 discussing astrology, they learn about astronomy and physics, as well as relevant  
179 psychological factors which influence our perceptions. In a similar manner, students use  
180 the laws of nature and relevant psychology to evaluate claims about UFOs, alien  
181 abductions, ghosts, and paranormal phenomena. In the process, they learn how easy it is  
182 to misperceive events, or fall victim to critical-thinking pitfalls such as selective recall  
183 and confirmation bias, and thereby incorrectly conclude that something is true when it is  
184 not.

185

186 It is important to emphasize that, as instructors, we do not – acting as ‘experts’ – tell our  
187 students that the Loch Ness monster, or astrology, or any other claim in the course is  
188 wrong; nor do we tell them that a scientific theory is ‘correct’ and that they should simply  
189 accept it because “we say so.” We let them judge the claims and theories for themselves  
190 based on the evidence, relevant science, and critical thinking skills they have learned.  
191 This ‘compare and contrast’ approach reduces the likelihood of an automatic rejection of  
192 a scientific explanation by eliminating the human tendency to reject an idea because it  
193 was presented in such a way as to imply that the students’ freedom of choice is being  
194 taken away from them; as in, “Don’t try to tell me what to think” (Erwin, 2014).  
195 Furthermore, evidence regarding some extraordinary claims is ambiguous and may yet  
196 prove to be true. In such cases, this is acknowledged and it reinforces the fact that not  
197 everything is clear-cut. We stress that science is a process of acquiring knowledge, and  
198 much has yet to be learned. Just as importantly, we stress throughout the course that the  
199 truth of an idea is not determined by whether we like it, or how many people believe it,  
200 but by the quality of evidence and logic used to support it (the S and L in the FiLCHeRS  
201 acronym). Our results show that this approach is successful in teaching students the  
202 effectiveness of the scientific method and critical thinking in evaluating claims, and in  
203 distinguishing science from pseudoscience.

204

205 In developing the course, we recognized that an appreciation of critical thinking and  
206 acceptance of science and scientific theories involves far more than a student’s exposure  
207 to scientific facts and the scientific method. Perhaps more importantly, it also involves  
208 their worldview; i.e., their beliefs and attitudes toward science. These affect their  
209 psychological readiness to examine various scientific theories and to engage in critical  
210 thinking (Alters and Nelson, 2002). Especially as regards the Big Bang Theory and the  
211 Theory of Evolution, students’ prior beliefs may prevent them from even considering the  
212 possibility that these theories might be correct because the ideas are perceived as a threat  
213 to their religious worldview. Failure to address this fundamentally important  
214 psychological component of students’ thinking will almost inevitably result in a failure to  
215 convince students that these ideas are not mere opinions but, rather, well-supported  
216 theories based on empirical evidence. In short, if a scientific theory (or its implications)  
217 is too far removed from a students’ current worldview, and if it is considered threatening,  
218 it will almost certainly be summarily rejected; in fact, a student may become even more  
219 convinced that it is wrong if simply presented with “the scientific facts.”

220

221 Accordingly, great care must be taken when discussing controversial topics so as not to  
222 threaten the students’ religious worldview (see NOMA below) or reinforce these negative  
223 perceptions. Furthermore, simply presenting the facts regarding these theories is unlikely  
224 to produce a shift in their perceptions of these theories. However, Social Justice Theory  
225 (SJT), which pertains to attitude change, provides a means of addressing this  
226 psychological factor. According to this well-established theory, which is based on what  
227 are termed *latitudes of acceptance and rejection*, a position that is substantially different  
228 from a person’s initial position can eventually be accepted if that person’s latitude of  
229 acceptance and rejection is incrementally shifted toward the new position. Small, gradual  
230 shifts of opinion can lead to a willingness to consider once incongruent ideas (Benoit, no

231 date). In contrast, a single, big shift leading to the acceptance of a highly incongruent  
232 idea does not usually occur. This is why a science course dealing with these topics  
233 should include an in-depth discussion of the nature of science, critical thinking, and the  
234 benefits of science, as well as information which will be relevant to the discussion of  
235 evolution (e.g., the age of the earth and universe). This information should be discussed  
236 before evolution is discussed because it leads to gradual shifts in students' latitudes of  
237 acceptance. Attempting to discuss evolution first, without having carefully laid a  
238 foundation for it, will be unlikely to produce attitude change because it lies too far  
239 outside a student's latitude of acceptance.

240  
241 Given that the Internet and airwaves are full of unfounded and pseudoscientific claims  
242 made by people lacking relevant expertise in science, our discussion of critical thinking  
243 also includes an evaluation of what constitutes an expert, especially a scientific expert  
244 (e.g., relevant degree, publication record, etc.). This is critically important because, if  
245 students cannot distinguish a reliable source of information from one that is not, they will  
246 be more likely to accept pseudoscience – and to reject real science. For example, if  
247 parents think a celebrity is a better source of information regarding the efficacy of  
248 vaccines, they might choose to not have their child vaccinated because they consider the  
249 celebrity to be more knowledgeable than a doctor or the medical establishment.

250  
251 Our working assumption for teaching both scientific facts and critical thinking concepts  
252 in the same course is rather obvious; namely, if students have facts, but cannot think  
253 logically, they will reach the wrong conclusion; and, if they can think critically, but lack  
254 scientific knowledge, they will also reach the wrong conclusion. Both are necessary, and  
255 by relating the critical thinking concepts to specific scientific and pseudoscientific claims,  
256 students learn the concepts better.

257  
258

#### 259 Additional Information about Topics and Topical Organization

260  
261 The course is organized into a sequence of topics specifically arranged so as to shift  
262 students' latitudes of acceptance and rejection in favor of science. In the main article,  
263 reference was made to the discussion, at the beginning of the course, of witch hunts and  
264 the Satanic Ritual Abuse cases as a means of demonstrating the necessity of both  
265 scientific literacy and critical thinking in order to avoid harm. In other words, the point  
266 of this discussion is to show that not only are science and critical thinking not bad things  
267 to be feared or rejected, they are actually good things to be embraced because they  
268 provide so many benefits to humanity and prevent so much harm.

269  
270 One source of confusion we also address early in the course are the distinctions between  
271 a fact, hypothesis, law, and theory. Understanding the distinctions between these terms is  
272 essential because most students are confused by them (Alters and Nelson, 2002), and this  
273 confusion serves, to some degree, as the basis for rejecting anthropogenic climate change,  
274 the efficacy of vaccines, the Theory of Evolution, and the Big Bang Theory (as in, "they  
275 are only theories"). This confusion also leads students to embrace many pseudoscientific  
276 concepts because, in the minds of many, "theories are just opinions" and their own

277 preferred opinion is just as good as the ‘misguided’ opinions of scientists. The discussion  
278 of the Big Bang theory is specifically intended to illustrate these distinctions and to  
279 emphasize the nature of a scientific theory; i.e., that a theory is a well-established  
280 explanation of what is observed. Once the students understand the observations upon  
281 which the Big Bang theory is based, and the ‘logic’ of the theory, they are much more  
282 likely to accept it, and the multi-billion year age for the universe. The same applies to the  
283 Theory of Plate tectonics and the Theory of Evolution. We also stress that no theory is  
284 complete; i.e., that it is an approximation of reality and is subject to change based on new  
285 evidence. This idea, which is the idea that science, unlike other ways of  
286 knowing/thinking, is self-correcting, is stressed throughout the course.

287  
288 Beginning with the discussion on astronomy, we make a concerted effort to inculcate a  
289 sense of awe in our students – a sense of the grandeur and wonder of the universe as  
290 revealed by science. This, we hope, further helps students embrace science as a way of  
291 knowing. In short, if science is seen as a source of beauty and wonder, rather than as a  
292 boring, cold, heartless endeavor that diminishes a sense of wonder, students are more  
293 likely to engage science. Many students, for example, develop an appreciation for  
294 cosmology once they understand that they really, truly are made of stardust. How  
295 wonderful.

296  
297 In the second part of the course, we introduce students to the experimental method. This  
298 includes such concepts as independent and dependent variables, confounding variables,  
299 placebo effects, control groups, experimental groups, double-blind studies, experimenter  
300 bias, and sample size. The emphasis, as always, is on sources of potential error and how  
301 the scientific method attempts to control for them. We emphasize, either implicitly or  
302 explicitly, that the procedures embedded in the scientific method for reducing and  
303 eliminating error are what makes science “a good thing” – something to be appreciated  
304 rather than rejected.

305  
306 These concepts are reinforced through a discussion of the FDA approval process,  
307 followed by discussions and analyses of various complementary and alternative  
308 medicines, such as homeopathy and therapeutic touch. As regards these two “therapies,”  
309 students have learned enough at this point in the course to realize they clearly violate the  
310 laws of nature, and any anecdotal evidence of their efficacy is due to a placebo effect,  
311 spontaneous remission, misdiagnosis, etc. Knowing this enables students to draw the  
312 conclusion that homeopathy and therapeutic touch are examples of pseudoscience. Just  
313 as importantly, they learn that CAM claims in general are virtually never tested or  
314 evaluated. Understanding this reinforces the efficacy of science and leads to healthy  
315 skepticism of CAM claims in general.

316  
317 Psychic research is covered following the discussion of CAM – again with an emphasis  
318 on the ways in which these phenomena, even if real, appear to violate our current  
319 understanding of the laws of nature. The lack of successful replication of seemingly  
320 positive results (the R in the FiLCHeRS rules) is also discussed as part of the analysis of  
321 these claims. While not definitively ‘debunking’ psychic phenomena, students come to  
322 understand that the scientific community has not accepted the existence of paranormal



323 phenomena – not because scientists are ‘biased’, but because the evidence is insufficient  
324 to conclude that paranormal phenomena are real (the S in the FiLCHeRS rules).  
325 Scientists also do not accept paranormal phenomena because they contradict a well-  
326 established body of knowledge in science. This principle of *non-contradiction* as a  
327 criterion of truth (i.e., the necessity of logical consistency between a claim and well-  
328 established knowledge) is stressed throughout the course.

329  
330 Following the foray into CAM and paranormal phenomena, we discuss principles of  
331 geology and plate tectonics, the formation and age of the earth, rock types, relative and  
332 absolute dating techniques, uniformitarianism, and finally genetics and evolution. By  
333 providing evidence of the ancient age of the universe and earth through the discussion of  
334 astronomy and geology, students more readily accept the scientifically established age of  
335 the earth. For students who might otherwise be swayed by advocates of Young Earth  
336 Creationism, this is critical for their potential acceptance of evolution because it shows  
337 them that the earth is, in fact, ancient in age, having existed for the vast amount of time  
338 required for biological evolution to have occurred (Smith, 2010a, b).

339  
340 Furthermore, by continually demonstrating the reliability of science as a way of knowing  
341 throughout the course, and specifically contrasting Creationism/Intelligent  
342 Design/Irreducible Complexity with the evidence for evolutionary theory, we are able to  
343 gradually shift the students’ latitude of acceptance toward a willingness to accept  
344 evolution because they can see the evidence for themselves – and the logic upon which it  
345 is based.

346  
347 The principle of logical consistency as a criterion for truth is particularly important in the  
348 discussion of young-earth creationism because its acceptance requires the negation of  
349 findings from astronomy, geology, paleontology, genetics, physics, and chemistry. In  
350 short, it is inconsistent with these other fields; consequently, one would have to discard  
351 virtually all of science, and the scientific method itself, in order to accept it. However,  
352 only by establishing the validity of astronomy, geology, the scientific method, etc., earlier  
353 in the course does this argument carry weight. This is why the topics are discussed in a  
354 specific sequence – and why evolution is covered last in the course. Without having laid  
355 an appropriate foundation, the discussion of evolution earlier in the course would almost  
356 certainly result in fewer students’ willingness to consider it and, in accordance with  
357 Social Justice Theory, might actually lead them to reject not only the idea of evolution,  
358 but other scientific conclusions discussed in the course as well.

359  
360 As with the “Age of the Universe argument,” we also use an “Evolution argument”  
361 which, after having covered genetics, mutations, and the evidence of evolution, is very  
362 compelling to students. One version of the argument for evolution we use is:

363  
364 1) Premise 1: Genetic change occurs; i.e., mutations occur producing new genes, new  
365 alleles, and new genotypes. (\*We also stress that, contrary to popular belief, not  
366 all mutations are bad. This mistaken belief must be addressed because it  
367 necessarily precludes an acceptance of evolution.)

- 368 2) Premise 2: Genetic changes can be passed from parent to offspring (i.e., the  
369 changes are inherited from parents)  
370 3) Premise 3: Natural selection occurs due to competition, with those  
371 genotypes/phenotypes best suited to their current environment surviving and  
372 producing more offspring  
373 4) Conclusion: Changes in the allelic frequencies of a population necessarily occur;  
374 therefore evolution occurs.  
375

376 Students accept each of the premises and, having done so, they are more likely to accept  
377 the conclusion that evolution occurs. Students recognize this as a valid and sound  
378 argument. Indeed, at this point, we flip the question from “Does evolution occur?” to,  
379 “How could it not occur?” Again, without understanding an argument, or what makes an  
380 argument valid and sound, this approach would probably not be effective; hence the need  
381 to include these concepts in a science course. Critical thinking/logic is essential to an  
382 acceptance of evolution, as was shown by a study of non-major biology students. Those  
383 who were less skilled in critical thinking were also more likely to hold nonscientific  
384 beliefs and their nonscientific views were not easily changed (Lawson and Weser, 1990).  
385

### 386 387 Limitations of Science

388  
389 There is one additional aspect to this process that we think is of critical importance to the  
390 observed shift in students’ willingness to accept, or consider, the Big Bang Theory and  
391 the Theory of Evolution. In order to address concerns students may have that these ideas  
392 threaten their religious beliefs, which constitute a key factor leading to the rejection of  
393 scientific theories and, by implication, science itself, we adopted Stephen Jay Gould’s  
394 concept of Non-Overlapping Magisteria (NOMA) (Gould, 1999). This concept is based  
395 on the idea that there are different domains of human experience and that science deals  
396 exclusively with the domain that can be empirically investigated. Science does not, by its  
397 nature, address questions of morality, or ultimate meaning or purpose, as do religion,  
398 ethics, and philosophy. Accordingly, we stress the strength of science throughout the  
399 course in terms of its ability to advance knowledge of empirical matters, but we also  
400 acknowledge its limits regarding other aspects of the human experience pertaining to  
401 meaning, purpose, and values. We also point out that the assertion one can either “be  
402 religious” *or* accept evolution, but not both, is an example of one of the fallacies they  
403 have learned; namely, the False-Dichotomy fallacy. As Joshua Rosenau of the National  
404 Center for Science Education said, “Recognizing and defusing the social pressures  
405 underlying science denial are key in convincing people that it is even worth considering  
406 scientific ideas that seem contrary to those of their social identity” (Rosenau, 2012).  
407

408 Having established the distinctions between science and non-science early in the  
409 semester, and putting forward the NOMA principle, our students are more receptive to  
410 scientific theories because they do not feel threatened by them. We recognize that not all  
411 scientists share this view about NOMA and might be philosophically opposed to this  
412 approach; however, the effectiveness of our approach, which addresses the psychology of

413 belief and is respectful of the worldviews of our students, has been shown to be quite  
414 effective based on our results involving the MATE assessment.

415  
416 Our approach is also consistent with that recommended by Smith (2010a, b) in a  
417 comprehensive review of the literature concerning philosophical and pedagogical issues  
418 regarding the teaching of evolution. He specifically addresses the need to acknowledge  
419 both students' worldview (and how it affects their willingness to consider evolution), and  
420 their misconceptions regarding science and evolution. Accordingly, he emphasizes the  
421 necessity of using pedagogical approaches based on recognition of cognitive factors  
422 affecting belief and conceptual change, as well as the need to teach the nature of science  
423 – not just the facts of science. He also argues that a NOMA-based approach is more  
424 successful in facilitating change in attitudes regarding evolution and, we would argue,  
425 would apply to the Big Bang theory and other scientific ideas students find  
426 discomfoting.

427

428

#### 429 Use of Case Studies and Assignments

430

431 There is one additional aspect of the course design we believe has been critical in our  
432 success; i.e., an active and cooperative learning approach built around case studies.  
433 Smith et al. (2005) reported that, between 1924 and 1997, more than 168 studies were  
434 conducted in an attempt to assess the relative effectiveness of various methods of  
435 learning, namely, cooperative, competitive, and individualistic pedagogies. A meta-  
436 analyses of these studies showed that the cooperative learning approach resulted in  
437 significant and substantial increases in learning; i.e., higher achievement, relative to  
438 either the individualistic or competitive approaches. The measures used to gauge the  
439 amount of learning included information learned, accuracy of knowledge, critical  
440 thinking/reasoning, and ability to creatively solve problems. In short, research strongly  
441 supports the conclusion that cooperative learning in its various forms is superior to  
442 lecture alone.

443

444 This same pattern was found by Springer et al.'s (1999) meta-analysis of the  
445 effectiveness of small group interactive engagement on learning by undergraduates in  
446 STEM courses. Results showed that students who worked in small groups performed at  
447 higher levels, had better attitudes, and were more likely to remain STEM majors than  
448 students in a traditional lecture class. In a similar review of the literature, Johnson,  
449 Johnson, and Smith (2007) reported that cooperative learning (which is incorporated into  
450 the case study approach used in the FoS course) tends to have several positive results  
451 which included, but were not limited to, improved learning and retention of the material,  
452 the more frequent use of critical thinking and metacognition, and improved problem  
453 solving. Based on the results of almost a century of research comparing cooperative  
454 learning with individual and competitive learning, the FoS course was designed to require  
455 active engagement and critical thinking on the part of students as they work together as  
456 members of a group to evaluate claims in lecture, in homework assignments, and in lab.

457

458

459 Peer Evaluation System

460

461 To ensure student engagement in group work, and a more accurate accounting of a  
462 student's participation within the group, we implemented a peer evaluation system  
463 modeled after Larry Michaelsen's Team-Based Learning approach (Parmelee et al.,  
464 2012); the system requires students to evaluate the contribution of their team members,  
465 for group-related tasks only, for purposes of determining each student's group score.  
466 The use of this type of system, which was highly recommended by faculty affiliated with  
467 the Case Study program at SUNY-Buffalo, helps alleviate students' concern that some  
468 members of the group will do all the work, but everyone – including slackers – will get  
469 the same grade.

470

471

472 Conclusion

473

474 Based on the assessments used to evaluate our course, the number of students assessed  
475 (475 for CAT test; 1443 for the pre-MATE assessment and 1251 for the post-MATE  
476 assessment), as well as the length of the assessment period (4-5 years), the results are  
477 robust and demonstrate the greater efficacy of the FoS course for teaching scientific  
478 reasoning/critical thinking and science literacy relative to traditional approaches to  
479 teaching General-Education science courses for non-majors. The success of the FoS  
480 course is based on the inclusion of principles of critical thinking and logical fallacies,  
481 information pertaining to the limits of perception and memory, the nature of science, and  
482 details regarding the scientific method. In addition, it specifically contrasts science with  
483 pseudoscience, and uses a case study approach requiring students to use their scientific  
484 knowledge to evaluate claims. This encourages higher order thinking and the perceived  
485 relevance of the material. Because the course deals with ideas that could potentially  
486 create dissonance in many students, it directly addresses this concept through  
487 consideration of relevant psychological factors affecting belief. Finally, the use of group  
488 work enhances learning, and the use of a peer evaluation system encourages participation  
489 of all students when doing group work.

490

491 It is this combination of approaches, which is not part of traditional science courses, that  
492 we believe has made the course successful in promoting the development of critical  
493 thinking and the acceptance of discomfiting scientific theories. It has helped our  
494 students better evaluate the innumerable examples of pseudoscientific claims that  
495 permeate our society. By adopting this approach to science education, our students have  
496 a greater understanding and appreciation of science and why it works, and they are more-  
497 informed and better-prepared to make decisions than are students who complete more  
498 traditional general-education science courses.

499

500

501

502 **REFERENCES**

503

504 American Association for the Advancement of Science. (1993). Project 2061 -  
505 Benchmarks for Science Literacy: A Tool for Curriculum Reform, Washington, DC.

506

507 American Association for the Advancement of Science. (2010). Vision and Change: A  
508 Call to Action, Washington, DC.

509

510 Alters, B.J., and Nelson, C.E. (2002). Perspective: teaching evolution in higher education.  
511 *Evolution* 56, 1891-1901.

512

513 Benoit, W.L. Persuasion (Communication Institute for Online Scholarship).

514 [http://www.cios.org/encyclopedia/persuasion/Esocial\\_judgment\\_1theory.htm](http://www.cios.org/encyclopedia/persuasion/Esocial_judgment_1theory.htm) (accessed 6  
515 February 2015).

516

517 Bernstein, D.A., Penner, L.A., Clarke-Stewart, A., and Roy, E.J. (2006). *Psychology*,  
518 Boston: Houghton Mifflin.

519

520 Day, P.K. (2013). Animal Planet's mermaid hoax special draws record ratings. Los  
521 Angeles Times. [http://articles.latimes.com/2013/may/30/entertainment/la-et-st-animal-](http://articles.latimes.com/2013/may/30/entertainment/la-et-st-animal-planet-mermaid-hoax-special-record-ratings-20130530)  
522 [planet-mermaid-hoax-special-record-ratings-20130530](http://articles.latimes.com/2013/may/30/entertainment/la-et-st-animal-planet-mermaid-hoax-special-record-ratings-20130530) (accessed 6 February 2015).

523

524 Erwin, P. (2014). *Attitudes and Persuasion*, New York: Psychology Press.

525

526 Gould, S.J. (1999). *Rocks of Ages: Science and Religion in the Fullness of Life*, New  
527 York: Ballantine.

528

529 Impey, C., Buxner, S., and Antonellis, J. (2012). Non-scientific beliefs among  
530 undergraduate students. *Astron Educ Rev* 11, 1-12.

531

532 Johnson, D.W., Johnson, R.T., and Smith, K. (2007). The state of cooperative learning in  
533 postsecondary and professional settings. *Educ Psychol Rev* 19, 15-29.

534

535 Johnson, M., and Pigliucci, M. (2004). Is KNOWLEDGE of SCIENCE Associated with  
536 Higher Skepticism of Pseudoscientific Claims? *Am Biol Teach* 66, 536-548.

537

538 Lawson, A.E., and Weser, J. (1990). The rejection of nonscientific beliefs about life:  
539 effects of instruction and reasoning skills. *J Res Sci Teach* 27, 589-606.

540

541 Lett, J. (1990). A field guide to critical thinking. *Skeptical Inquirer* 14, 153-160.

542

543 Martin, M. (1994). Pseudoscience, the paranormal, and science education. *Sci & Educ* 3,  
544 357-371.

545

546 Miller, J.D. (1998). The measurement of civic scientific literacy. *Public Underst Sci* 7,  
547 203-223.

548  
549 National Science Foundation. (2014). Science and Engineering Indicators 2014,  
550 Arlington, VA: National Science Board.  
551  
552 Parmelee, D., Michaelsen, L.K., Cook, S., and Hudes, P.D. (2012). Team-based learning:  
553 A practical guide: AMEE Guide No. 65. *Med Teach* 34, E275-E287.  
554  
555 Rosenau, J. (2012). Science denial: a guide for scientists. *Trends Microbiol* 20, 567-569.  
556  
557 Rowe, M.P. (2015). Crazy about cryptids! An ecological hunt for Nessie and other  
558 legendary creatures. National Center for Case Study Teaching in Science.  
559 [http://sciencecases.lib.buffalo.edu/cs/collection/detail.asp?case\\_id=779&id=779](http://sciencecases.lib.buffalo.edu/cs/collection/detail.asp?case_id=779&id=779)  
560 (accessed 27 June 2015).  
561  
562 Rutherford, F.J., and Ahlgren, A. (1990). Science for All Americans, Oxford: Oxford  
563 University Press.  
564  
565 Smith, K.A., Sheppard, S.D., Johnson, D.W., and Johnson, R.T. (2005). Pedagogies of  
566 engagement: Classroom-based practices. *J Eng Educ* 94, 87-101.  
567  
568 Smith, M.U. (2010a). Current Status of Research in Teaching and Learning Evolution: I.  
569 Philosophical/Epistemological Issues. *Sci & Educ* 19, 523-538.  
570  
571 Smith, M.U. (2010b). Current Status of Research in Teaching and Learning Evolution: II.  
572 Pedagogical Issues. *Sci & Educ* 19, 539-571.  
573  
574 Springer, L., Stanne, M.E., and Donovan, S.S. (1999). Effects of small-group learning on  
575 undergraduates in science, mathematics, engineering, and technology: A meta-analysis.  
576 *Rev Educ Res* 69, 21-51.  
577  
578  
579

580  
581  
582  
583

## 2. Example Course Syllabus

*Foundations of Science*

The collage features several images: a spiral galaxy, Albert Einstein writing the equation  $R_{ik} = 0$  on a chalkboard, a book cover for 'Natural Remedies' by Prof. Dr. Hupa Ibar, a UFO in a field, a human skull, a woman in a red headscarf, the Grand Canyon, and a forest scene with a fallen log.

584  
585  
586

# Foundations of Science

BIOL 1436-04; CRN: 23793

Spring Semester 2015

587  
588  
589  
590  
591  
592  
593  
594  
595  
596  
597  
598  
599  
600  
601  
602  
603  
604  
605  
606  
607  
608  
609  
610  
611  
612  
613  
614  
615  
616  
617  
618  
619  
620  
621  
622  
623  
624  
625  
626  
627  
628  
629  
630

**Course Number and Title:** BIOL 1436-04: Foundations of Science (4 credits)

**Class Time:** Tuesday and Thursday (9:30-10:50)

**Class Meeting Room:** Lee Drain Building (LDB) 207

**Name:** Dr. Marcus Gillespie: **Office Number:** LDB 200 (Dean's Office area)

**Office Hours:** MWF 9:00-11:00 in LDB 200 (Dean's Office)

**Phone:** 294-1945

**E-mail:** [marcusg@shsu.edu](mailto:marcusg@shsu.edu)

**\* I always try to have an "open-door" policy as regards office hours, so please feel free to call or come by any time that you have a question.**

**Catalog Description:** The course focuses on the nature of science as a reliable method of acquiring knowledge about the natural world. Students will learn how to apply key scientific facts, concepts, laws and theories to distinguish science from non-science, bad science, and pseudoscience by analyzing a variety of claims and case studies. By employing an innovative, interdisciplinary approach to science education, this course is designed to increase science literacy and critical thinking skills for introductory-level students who are not science majors. **Students MUST enroll concurrently in the corresponding lab for this course.** Credit: 4

**Course Description/Rationale:** The rationale for this course is to enhance your scientific literacy by making science both interesting and relevant. This will be accomplished by helping you understand how science works and how you can apply science in your daily life, especially when evaluating extraordinary/unusual claims in which almost everyone is interested – including UFOs, ESP, and mysterious creatures like Big Foot.

Accordingly, the overarching objectives of this course are to enhance your scientific literacy and critical thinking skills using an integrated, multidisciplinary approach that draws upon key concepts from the natural sciences, psychology, and critical thinking. The three broad goals of this integrated course are:

- 1) to enhance your understanding and appreciation of science as a proven and reliable method of comprehending the natural world, and to help you distinguish scientific from non-scientific and pseudoscientific ways of thinking about the world;
- 2) to provide you with a more well-rounded understanding of science by teaching you the basic principles, facts, laws, and theories from the natural sciences and, when relevant, from psychology;



631 3) to teach you specific rules of critical thinking so that you can use them, and your  
632 knowledge of science and the scientific method, to make more informed decisions.  
633 All three goals are inseparable and are interwoven throughout the course.  
634

635 These three goals will be accomplished by using information from the natural sciences, the  
636 scientific method, and rules of critical thinking to examine a range of claims that are  
637 common in our society. These claims include, but are not limited to, extraordinary claims  
638 and pseudoscientific claims such as those pertaining to astrology, UFOs, legendary  
639 creatures, the lost continent of Atlantis, alternative medicines, paranormal phenomena, and  
640 others. Through an examination of these and other topics, as well as the evidence for key  
641 scientific theories, you will learn more about the nature of science and the scientific method,  
642 how to more reliably evaluate the veracity of claims, and how to avoid common errors in  
643 reasoning that lead to erroneous conclusions. This knowledge will help protect you from  
644 fraudulent and misleading claims and will enable you to make more informed decisions  
645 regarding issues of significance to our society. Finally, it is my hope that you will gain a  
646 greater appreciation of the beauty and wonder of the natural world as revealed by science.  
647

648 **Upon successful completion of the course, you will be able to:**

- 649
- 650 1. Understand and apply scientific terminology pertaining to the nature and conduct of  
651 science, such as hypothesis, law, theory, control group, placebo group, confirmation  
652 bias, and double-blind study;  
653
  - 654 2. Apply methods of reasoning used by scientists: i.e., the scientific method based on the  
655 requirements of falsifiability/testability, logical consistency, comprehensiveness of  
656 evidence, intellectual honesty (objectivity), replication of results, and sufficiency of  
657 evidence;  
658
  - 659 3. Analyze and evaluate common logical fallacies and perceptual biases that interfere with  
660 the ability to draw reasonable and/or correct conclusions, as well as the difference  
661 between facts, informed opinions, and uninformed opinions;  
662
  - 663 4. Learn key concepts and theories from a variety of scientific disciplines, especially  
664 physics, biology, and geology;  
665
  - 666 5. Demonstrate how to distinguish science from pseudoscience by scientifically evaluating  
667 a wide variety of extraordinary claims that are common in our culture today.  
668

669 Just as importantly, upon completion of this course, we hope that you will have a greater  
670 appreciation of the role of science in all of our lives and the need for scientific literacy and  
671 critical thinking to help make informed decisions about issues currently facing our society.  
672

673 **Methods of Instruction:** This course is based on a combination of traditional lecture  
674 format, coupled with the use of “**case studies**” which involve classroom-based group work,  
675 class discussions, homework assignments, and readings. The use of **case studies** (which are  
676 stories with an educational purpose) has been shown to: significantly increase student  
677 interest, enjoyment, and involvement with a course; improve grades; and enhance students’  
678 critical thinking ability.  
679

680 **Students are required to take the lab concurrently** because the lecture  
681 and lab constitute a single course. The lab is also based on the use of case studies.  
682

683 **Course Materials:** There are two textbooks for the course and a lab manual. The first book  
684 listed below (Foundations of Science) is an integrated science text that provides the  
685 scientific knowledge for the course. The second text (How to Think about Weird Things)  
686 provides an understanding of how to use both critical thinking and scientific reasoning to  
687 evaluate extraordinary/weird claims.  
688

689 1) ***Foundations of Science - Custom*** (This is a custom edition of *Conceptual*  
690 *Integrated Science*), by Hewitt, Lyons, Suchocki, and Yeh, 2012,  
691 Pearson/Addison-Wesley, San Francisco. ISBN 97812696855350  
692

693 2) ***How to Think About Weird Things: Critical Thinking for a New Age*** –  
694 7e, 2013, by Theodore Schick and Lewis Vaughn, McGraw-Hill. ISBN  
695 9780078038365 (paperback).  
696

697 3) **Lab manual: *Foundations of Science Lab Manual*** ISBN  
698 9780738068237  
699

700 **Scantrons:** You will need approximately 5 of the "long" Scantron test forms (the 100-  
701 question version; 50 on front and 50 on back [form #882-E]) and 10 of the "short" Scantron  
702 test forms (15 question "Quizzstrip"; form #815-E); you might also need a calculator for lab.  
703

704 **Supplementary Readings:** If used, these will be distributed either in class or placed on  
705 BlackBoard.  
706

### 707 Grading Criteria

709 **Because the lecture and lab portions of the course are considered to be part of the**  
710 **same course, the final course grade is based on a combination of lecture tests, lecture**  
711 **coursework, and lab work. In other words, there is no separate lab grade.**  
712 **Specifically, the lecture tests constitute 48% of the grade, the lecture assignments**  
713 **constitute 24.6%, attendance constitutes 3%, and the lab assignments constitute**  
714 **24.4%. Because of this, students must remain enrolled in both the lecture and lab for**  
715 **the entire semester; they cannot drop either the lecture or the lab and receive a**  
716 **grade for the course. The 4 in the 1436 designation for the course indicates that this**  
717 **is a 4-credit course that has a lab component.**  
718

719 Grading will be based on 3 lecture exams (including the final), eight (8) sets of reading  
720 questions, 3 group case study activities, 3 group homework assignments, individual and  
721 group lab quiz grades, peer evaluations by your fellow group members in both lecture and  
722 lab (see details below), a syllabus quiz, and attendance. You will also be given a **critical**  
723 **thinking assessment** at the **beginning and end** of the semester that serves as **extra**  
724 **credit**. This extra credit can be very important to your overall grade, so PLEASE do your  
725 best on both exams!  
726

727 Please note that the number of assignments may be changed slightly (e.g., add or drop a  
728 homework assignment) if circumstances warrant such a change. If this happens, it will have a  
729 slight effect on the percentage points associated with each aspect of the course.  
730

731 In an integrated course such as this, each topic serves as the foundation for subsequent  
732 material; consequently, **students should remember and understand all of the basic**  
733 **principles covered previously in the course** in order to apply them in the case studies  
734 and labs, and to do well on exams.  
735

736 **Tests:** There are 3 major exams and each will consist of multiple-choice and matching-  
737 type questions, and will be worth 750 points. (Don't panic! There won't be 375 two-  
738 point questions – just a standard number of questions). Tests total 2250 points and  
739 constitute 48% of the total course grade.  
740

741 **Reading Quizzes:** Each week, you will be assigned readings from the books listed above  
742 and, in some cases, from PowerPoint lectures that are posted on BlackBoard but which  
743 are not discussed in class. To ensure that students read these assignments, **a set of**  
744 **reading questions will normally be given every two weeks over the reading**  
745 **material.** These assignments will be **completed outside of class online, in**  
746 **BlackBoard.** You are asked to *use both your books and notes* to complete the  
747 assignments. Once available, you may re-take the reading quiz assignment as many  
748 times as you wish before the due date for the reading assignment. If you experience  
749 computer problems, please contact the online helpdesk (936-294-2780) before the  
750 assignment is due. The reading quizzes will be available for a week, or more, before  
751 they are due. **They can be retaken as many times as you want before the due date**  
752 **and it is the highest score that is accepted.** The quizzes are randomly created from a  
753 pool of questions. The pool typically consists of 60 to 90 questions. Because the  
754 computer randomly selects questions from the question pool when it generates a quiz,  
755 each version of the quiz will be different and may consist of some questions that are  
756 repeated, as well as new questions. The more times you take it, the more questions you  
757 will see before the test. We suggest you complete the reading quizzes early in case you  
758 have questions or computer problems. Because the reading quizzes are available for an  
759 extended period of time and can be re-taken before the due date, **late reading quizzes**  
760 **will not be accepted.** Again, we do not recommend waiting to the last available day to  
761 complete the reading quizzes, as you may experience computer and/or technical issues.  
762 By attempting the quizzes earlier in the week, you will ensure you earn a higher grade  
763 and submit the assignment on time.  
764

765 As regards the reading assignments, **I strongly recommend that you thoroughly read**  
766 **the material – don't just skim it. If you try to avoid actually reading the material**  
767 **and, instead, merely skim the chapter until you find something that 'looks right,'**  
768 **you will not learn the material. This technique really doesn't work because, as**  
769 **emphasized throughout the course, facts presented in isolation from one another**  
770 **don't make sense. You have to see the connections among the facts in order to**  
771 **make sense of them – and to remember them! This is why reading all of the**  
772 **material for comprehension does work!**  
773

774 ***Pacing your work is the key to not being overwhelmed.***  
775

776 **Once the quizzes have been submitted, the answers will be posted on BB. A**  
777 **screen will show you which questions you earned credit on and which you missed.**  
778 **In many cases, explanations are provided for the answers as well.** Many students  
779 print off their completion reports for study guides. Please remember that this course is  
780 about *understanding and reasoning – not memorization*. So, you should always look  
781 over the completion reports to ensure that you understand the concepts. **In other**  
782 **words, the quizzes and completion reports serve as a study**  
783 **guide for the readings.**

784  
785 There are a total of **570** points possible for these quizzes, including 20 points for the  
786 **syllabus quiz**. Together, these are worth **12.2%** of the course grade.

### 787 788 Case Studies and Peer Evaluation

789  
790 In this class, students will be divided into groups by the instructor. Each group will  
791 consist of about 5 students who will work together throughout the semester on both  
792 case studies and the three group homework assignments that will be completed outside  
793 of class. As you will see, **group scores are usually better than individual scores, and**  
794 **so this process normally improves an individual's grade.** In addition, *group effort*  
795 *helps everyone learn the material better because everyone is involved in teaching*  
796 *one another*. So, individuals normally do better on tests as a result of this prior group  
797 preparation process – assuming they put in the effort. Group work in lecture constitutes  
798 12.4% of the total course grade. Groups also will be formed in lab, and group work in  
799 lab constitutes 9.6% of the total course grade. **So, in total, group scores comprise**  
800 **22% of one's grade in the course.**

801  
802 **Many students are initially uneasy about the idea of working in groups** because it  
803 is often the case that, in previous classes, some members of their group did all or most  
804 of the work, while others did little or nothing – but everyone received an equivalent  
805 grade. This should **not be a problem** in this course because of the importance of group  
806 peer evaluation procedures to a student's grade. The procedures for performing peer  
807 evaluations are described below.

### 808 809 Peer Evaluation Process

810  
811 If you are in a group consisting of 5 members (including yourself), you will be allotted  
812 40 points to distribute among the members of your group following each group  
813 assignment. *You do not give points to yourself.* (If you are in a group of 6 members, you  
814 will be given 50 points, etc...) If you believe that everyone contributed equally to the  
815 group work, then you would pay/give everyone 10 on the assignment. If everyone in  
816 the group feels the same way, then everyone receives a total of 40 points from their  
817 peers, which results in an average score of 10 ( $40/4 = 10$ ). Please note that 10 is the  
818 maximum number of points that may be awarded.

819  
820 You must be fair in your assessments, but if someone in your group did not contribute  
821 adequately, then you should give them fewer points. **If they were not present or did**  
822 **not contribute to an assignment, they should receive no points.**

824 It is imperative that you assign these scores **PRIVATELY** (NOT in front of your team  
825 members) AND that you do this on the day the case study was conducted or the  
826 assignment turned in! **It is also critically important that you do not 'agree' to give**  
827 **each other good scores.** **This is guaranteed to undermine the integrity of the**  
828 **process and will inevitably result in bad feelings if someone in the group doesn't**  
829 **do his or her fair share of the work because he or she thinks they're going to get a**  
830 **good score no matter what they do.**

831  
832 Also, in order to be fair and accurate, DO NOT wait until the midterm or the end of the  
833 semester to assign these participation scores (for reasons that will be apparent when  
834 we discuss the limits of peoples' memories); rather, **assign the scores immediately**  
835 **after the assignment is completed.**

836  
837 **At the end of the semester, your peer evaluation score is equal to the average of**  
838 **the amount of peer evaluation points you received from the members of your**  
839 **group - converted to a percent. Accordingly, an average of 10 points equals 100%;**  
840 **an average of 90 equals 90%, and so on. This score is then used to determine the**  
841 **number of *group* points that you will receive at the end of the semester.** If you  
842 receive an average of 10, you will receive 100% of the points earned by your group on  
843 the group assignments. If you receive an average of 9.2, then you will receive 92% of  
844 the group points, and so on.

845  
846 ***If you have an average of less than 7, you will not receive ANY of the group points.***

847  
848 **Use the following additional criteria when assigning points:**

- 849  
850 1) Be fair! If a person made a genuine effort to contribute, then award 10. ***Do not give***  
851 ***points to a student for an assignment if that student was absent the day a group***  
852 ***assignment was done in class. And, do not give any points on a group homework***  
853 ***assignment if the person did not contribute.***
- 854  
855 2) You cannot give anyone in your group more than 10 points. (This prevents people  
856 from giving their friends an unfairly large amount of points, which would  
857 necessarily hurt other members of the group because there would be less points to  
858 distribute to other group members).
- 859  
860 3) **You do not have to distribute all of the points.** If someone does not contribute  
861 appropriately, then give him or her less than 10 points. And, as stated previously, if  
862 someone is absent in your group on the day of the assignment, then give him/her no  
863 points; i.e., a zero.
- 864  
865  
866 4) ***As stated above, anyone receiving an average of less than 7.0 on his or her peer***  
867 ***evaluation at the end of the semester will automatically lose his or her group-***  
868 ***based points.*** So, for example, if a student receives an average of less than 7.0 in  
869 lecture, the student will lose all of the group-based points earned by the group in  
870 lecture. This amounts to a maximum 580 points out of 4690 possible in the course  
871 and constitutes 12.4% of the total course grade; i.e., just over one letter grade. In  
872 the same way, if a student receives an average of less than 7.0 on his or her peer  
873 evaluation in lab, the student will lose all of the group-based points in lab, which is a

874 maximum of 450 points. This equals 9.6% of the total course grade. And, if a  
875 student received less than 7.0 in *both* lecture and lab, they would lose up to 22% of  
876 the total course points; i.e., more than 2 letter grades. The point is, **“Do your best to  
877 contribute to the group😊!”**  
878

879 **It is the last rule that normally ensures everyone will contribute to the group’s**  
880 **efforts.** Also, the fact that the score is an average prevents anyone who might be unfair in  
881 the awarding of points from single-handedly undermining the final grade of a group  
882 member. And, if one student gives a score that is much less than those of other students  
883 (which implies that it is unfair), ***I have the option of ignoring that score.*** In fact, I can  
884 override a low average score if there is evidence that the grade was unfairly assigned by the  
885 group. ***This serves as a safety net for each student.***  
886

887  
888 This type of peer-evaluation method has been used in many universities and works very  
889 well. Students like it because it encourages everyone to pull their own weight and  
890 contribute to the group.  
891

892 Example: Imagine that a student named Linda received peer evaluation amounts in lecture  
893 of 8, 10, 9, 10, and 10, for a total of 47, which is an average of 9.4, or 94%. John received all  
894 10s and so received all of the group points. Billy, who skipped class, didn’t sit with his  
895 group, and contributed very little to the group, received scores of 2, 0, 3, 0, and 2 for a total  
896 of 7 points and an average of 1.4, or 14%. So, Linda received 94% of the group’s overall  
897 grade for the semester. With an average of 14%, poor Billy lost 580 points, which means his  
898 overall course grade dropped by 1.2 letter grades. And, because his average was 71%  
899 before the deduction, Billy failed the course (71% - 12.2% = 58.8%). This is not the happy  
900 ending any of us wants to see!  
901

## 902 ***How to Earn a Good Peer Evaluation Score***

- 903
- 904 1) **Sit with your group every day and learn everyone’s names. Get to know them.**  
905
- 906 2) **Come prepared to contribute** to the case studies and quizzes by attending all classes (so  
907 you know what’s going on), and reading the assigned material. In other words, make  
908 sure you can and do contribute constructively to the discussions.  
909
- 910 3) **Be positive and friendly and treat the other members of the group the way you want to**  
911 **be treated.** In other words, be courteous and respectful of others’ comments and ideas -  
912 even if you don’t agree with them. Be willing to accept that your initial thoughts might  
913 be incorrect, but also don’t be afraid to courteously express your views even if they are  
914 different from those of others in the group.  
915
- 916 4) **Contribute significantly to the group homework assignments.** Do your part and do it on  
917 time – not at the last minute. \* **You should keep a copy of what you have written** in case  
918 there is a dispute regarding your contribution. Remember, I can override the group’s  
919 evaluation in the unlikely event that it was unfair. ***However, this normally requires***  
920 ***that you be able to document what you contributed so that I can base my decision***  
921 ***on evidence rather than hearsay.***  
922



923 5) **Come to any and all group meetings and, if you absolutely cannot be at a meeting because**  
924 **of work or other legitimate schedule conflicts, make sure you keep in touch** with the  
925 group via e-mail, Facebook, or phone and let them know ***ahead of time*** that you can't  
926 come. Most people will understand if they know someone has legitimate reasons for not  
927 attending a meeting. But, you need to contribute ideas, written material, etc., even if you  
928 can't join the group in person.

929  
930 **An initial, trial peer evaluation will be done approximately half way through the**  
931 **semester.** This evaluation will NOT count as part of the grade and will serve only to give  
932 each person feedback from the members of his or her group so that he or she can correct  
933 any problems that might exist.

934  
935 **Very important note: Although points are not given for completing peer evaluations,**  
936 **points will be deducted if the rules described above were not followed and/or if you**  
937 **do not submit a peer evaluation for your group members. Specifically, 40 points will**  
938 **be deducted for not submitting a peer evaluation when it is requested. So, please do**  
939 **the evaluation!**

### 940 Homework Assignments

941  
942  
943 There will be **three group** homework assignments worth a total of 400 points (8.5% of  
944 course grade). These assignments entail analyses of actual arguments and claims. For  
945 example, the first assignment involves evaluating a series of arguments. The second  
946 assignment entails an analysis of a product that is available to "help maintain your health".  
947 The question your group will try to answer is, "Does it work?" "Is it based on science or  
948 pseudoscience?" Doing these assignments will help you evaluate the innumerable claims  
949 you will encounter in your life.

950  
951 The third assignment is known as FiLCHeRS and is worth 220 points. This assignment  
952 involves the application of the FiLCHeRS rules (which are discussed in class) to an analysis  
953 of an extraordinary claim you will be assigned to evaluate. The assignment consists of both  
954 multiple choice and short answer questions and is a **capstone** assignment in that it entails  
955 using information learned *throughout* the course to evaluate the claim.

### 956 Attendance and Make-up Policies

957  
958 This course abides by University Policy and Regulations concerning attendance (See the  
959 Undergraduate Catalog). Accordingly, "regular and punctual attendance" is expected of  
960 each student at Sam Houston State University:

961  
962 In a course such as this, in which group effort is a significant part of the grade, students  
963 genuinely need to come to class so that they can contribute to their group's success. Those  
964 who are prepared and contribute positively will be highly valued by their group! **This**  
965 **course also moves quickly and many ideas build on one another and are used throughout**  
966 **the course. So, if a student misses class, he or she will almost certainly be hurt academically.**  
967 In short, attendance matters and ***is required***.

968  
969 Because attendance is so important, **I give each student 150 points at the beginning of the**  
970 **semester.** Although this is part of the total points possible for the course, it is non-academic  
971 (i.e., not dependent on tests and assignments) and so serves as a *grade cushion*. All you

972 have to do to keep these points is to come to class. How much easier can it get! However,  
973 because attendance *is* so important, **students will lose 30 points for each unexcused**  
974 **absence after the first absence.** (In order for an absence to be *excused*, some form of  
975 documentation must be provided to show that it was legitimate; this can include a  
976 physician's note, a funeral announcement, legal notice, etc. The documentation must be  
977 provided within one week of returning to class.) Also, tardies can be counted as absences.  
978 So, if a student misses 6 times, is tardy 6 times, or has some combination thereof (e.g., three  
979 unexcused absences and three tardies), he or she will lose their 150 points, which equals  
980 3.1% of his or her total grade.

981

982 **If someone misses more than 6 times, that student automatically FAILS THE COURSE**

983

984 **So, please come to class!**

985

**Examples**

986

**0-1 absence/tardies – no point deduction**

987

**2 absences/tardies – 30 points**

988

**3 absences/tardies – 60 points**

989

**4 absences/tardies – 90 points**

990

**5 absences/tardies – 120 points**

991

**6 absences/tardies – 150 points (3.1%)**

992

**> 6 absences/tardies = F**

993

994 **Please understand that these policies are intended to prevent students from**  
995 **failing the class because of skipping so many classes that they can't learn the**  
996 **material. In effect, these attendance rules keep most students on track and**  
997 **reduces the number of students that might otherwise fail the course.**

998

999 1. In addition to the required attendance/tardy policy, it is important that you stay for  
1000 the entire class -- **please do not leave the class room early** unless you are sick or  
1001 have cleared it with me before class begins. **Students can be counted absent if they**  
1002 **leave the class early without permission.**

1003

1004 2. If you know you will miss a class (because of an excusable event, such as an "away"  
1005 baseball game and you are a member of SHSU's baseball team), let me know ahead of  
1006 time and we can make arrangements for a make-up exam.

1007

1008 If, for whatever reason, you **miss an exam**, please contact me as soon as possible to  
1009 determine if and when the exam may be made-up. Make-up exercises and exams are  
1010 only allowed based on my approval, and only if you have contacted me within a  
1011 reasonable amount of time (one day!) following the absence.

1012

1013 **3. Late Work Policy: The three group homework assignments are to be turned in**  
1014 **at the beginning of class (on the day they are due). These assignments can be**  
1015 **handed in a maximum of one class period after the due date; however, points**  
1016 **will be deducted depending upon how late it is submitted. If, for example, the**  
1017 **homework assignment is due on Tuesday at 9:30 AM, but is handed in on**  
1018 **Tuesday at 1 PM, 5% will be deducted. If the paper is turned in on Wednesday,**  
1019 **10% of the value of the assignment will be subtracted. And if it is submitted at**



1020  
1021  
1022  
1023  
1024  
1025  
1026  
1027  
1028  
1029  
1030  
1031  
1032  
1033  
1034  
1035  
1036  
1037  
1038  
1039  
1040  
1041  
1042  
1043  
1044  
1045  
1046  
1047  
1048  
1049  
1050  
1051  
1052  
1053  
1054  
1055  
1056  
1057  
1058  
1059  
1060  
1061  
1062  
1063  
1064  
1065  
1066  
1067

**the beginning of the class on the Thursday immediately following the Tuesday due date/time, 20% will be deducted. It must be emphasized that, after that date, the assignment cannot be turned in and no grade will be received for the assignment.**

**\* This late policy does not apply to the reading quizzes. These cannot be completed after the due date and time.**

Please check BlackBoard as soon as the grades are posted. **Students have a maximum of two weeks to contest a grade.** For example, if the grade is incorrect, or if it was not posted, you need to notify me within two weeks of my posting of the grade. After two weeks, if no errors have been reported to me, the grade stands as is.

**What happens if you miss a Case Study?** If you miss a case study in lecture because of an excused absence, you can partially make it up by completing it on your own. This will entail writing an essay response to any questions that may have been asked in class regarding the case, as well as taking the quiz over the case study. **The maximum score that a student can achieve is the score earned on the assignment, OR the group's score – whichever is lower.** This policy ensures that your grade is tied to the group grade, but it also provides some grade 'cushion' for those that may be sick or unable to come to class on the day of the case study, while also discouraging students from simply skipping the day of a case study. ***Please remember that your group must (based on the rules for peer evaluations) give you a zero for group participation on the case study if you are absent.***

### **Lab Grades**

**The lab grade will consist of both individual scores and group-derived scores.** Most of the labs will be based on case studies that will involve instructor-led discussions in which members of groups work together to develop responses, propose hypotheses and experimental designs, or offer explanations for what has been reported or observed. In short, labs involve a lot of discussion – both within each group and among groups. The lab instructor will facilitate these discussions. The discussions make the labs fun and interesting because they are not based simply on rote memorization and fill-in-the-blank activities; rather, they involve group discussion and exploration of topics.

**At the beginning of the lab, each student will be given a short, Individual Lab Quiz (ILQ) over the information provided in the lab readings and relevant readings assigned in lecture. This is intended to ensure that everyone reads the ***lab exercise and textbook background readings*** (listed on the lecture syllabus) ***before coming to class so*** they will be prepared for the lab discussion. The quiz will include some vocabulary terms listed at the end of the lab exercise and related lecture notes and readings. Questions will be multiple-choice and/or short answer essay.**

**At the end of the lab, each group will be given a Group Lab Quiz (GLQ) regarding the information covered in lab. The group will work together as a team to complete it. Groups will be created by the lab instructor at the beginning of the year. The purpose for the group work is to enhance understanding of the material by having**

1068 group members help teach each other the material and reinforce the key concepts  
1069 covered in the lab. The group scores obtained over the semester will be adjusted by  
1070 the peer evaluation score the student receives from his/her peers using the  
1071 procedures outlined on the peer evaluation form.

1072  
1073 A total of 10 lab case studies will be completed and **students will be allowed to**  
1074 **drop both their lowest individual and their lowest group lab grade.**  
1075 Accordingly, the lab quizzes, both individual and group, total 1140 points. These  
1076 points will account for approximately 24.4% of your overall course grade.

1077  
1078 In summary, students can earn 690 *individual* points and 450 *group* points. **Please**  
1079 **remember that, in this course, the lecture and lab grades are combined to**  
1080 **determine your overall course grade.** Thus, there is a total of 1140 lab points  
1081 possible in lab.

1082  
1083 In total, the lab portion of the course grade constitutes 24.4% of your grade – which is  
1084 almost identical to the amount that would be earned relative to a standard lecture + lab  
1085 class. In other words, if you took a science class in which the lecture and lab were separate,  
1086 and earned 4 hours of credit for this combination, the lab would constitute 1 of 4 total  
1087 hours, or 25% of the grade component for the science class. **However, please remember**  
1088 **that, in this course, the lecture and lab grades are combined to determine your overall**  
1089 **course grade.**

### 1090 Extra Credit

1091  
1092 **At both the beginning and end of the semester, you will be given the opportunity to**  
1093 **earn extra credit worth up to 9% of the total course grade!** That's 422 points! This  
1094 opportunity to significantly improve your grade will be in the form of a critical thinking  
1095 assessment – either the CAT assessment or the FSE assessment. This assessment, which  
1096 will be given in lab, is required by the University's reaccreditation requirements. It is  
1097 extremely important that you do your best on both exams because your scores reflect upon  
1098 the university and indicates how well our students are doing relative to students at other  
1099 universities in the United States. It's your chance to not only earn a lot of bonus points, but  
1100 also to make SHSU look good! So, please do your best.

1101  
1102 Each assessment is worth 120 points. The grading procedure for this assessment consists  
1103 of simply *adding* the two scores together. However, if the sum of the two scores is above  
1104 144 points, a *multiplier* is used to further increase the number of points you can earn. (It's a  
1105 bit like the multiplier used on some lotteries.) This means that the procedure for awarding  
1106 bonus points is very generous.

1107  
1108 For example, if you made a combined score of 110 points on the assessments, the 110  
1109 points will be added to your grade. **And, if your total on both assessments is greater**  
1110 **than 144 points, you will receive even more extra credit points!** The amount you  
1111 would receive for scoring above 144 points is equal to the number of points you earn above  
1112 144, *multiplied by 2* – **with a maximum of 190 extra points possible. (190 points is**  
1113 **equal to 4% of the course grade.)** **So, if you received the maximum number points on**  
1114 **these exams, you would receive a grand total of 430 bonus points (9% of the course**  
1115

1116 **grade), which is almost an entire letter grade!** This is why it's important to do your best  
1117 on both assessments.

1118  
1119 For example, if you made a 70 the first time you took the assessment and a 95 the second  
1120 time, you would have earned a total of 165 points. Because the combined score for the two  
1121 assessments is 21 points more than 144 points, the multiplier is used and you would earn  
1122 42 *more* bonus points in addition to the 165 you'd already earned:  $165 - 144 = 21$ ;  $21 \times 2 =$   
1123  $42$ ;  **$165 + 42 = 207$  total bonus points**). \*Because these are bonus points, they would NOT  
1124 be adjusted by a peer score. They're all yours!

1125  
1126 Because you are being asked to take this critical thinking assessment at the beginning of the  
1127 semester (the pre-test) before you have been taught the course material, we do not want  
1128 you to be discouraged if you do not do as well as you might have expected on the pre-test.  
1129 That is why we give additional bonus points if you achieve a combined score above 144 –  
1130 which is a mere 60% of the possible points on the assessments! Because the score on the  
1131 second assessment (the post-test) **SHOULD improve if you learn from the course and**  
1132 **you do your best on the assessment**, you can easily make a good overall score and earn a  
1133 significant number of bonus points. *You should know that a few students have actually*  
1134 *earned the maximum number of bonus points possible!*

1135  
1136 *Please note that these assessments are the only possible sources of extra credit in the*  
1137 *course. In other words, no individual extra credit is given and, with the exception of one*  
1138 *individual and one group lab grade, no other grades are dropped.*

1139  
1140  
1141

### Grade Determination

1142 **Your grade is based on the percentage of points earned relative to the**  
1143 **maximum number possible for the course (4,690).** The percentage of the total  
1144 possible points determined by individual effort is 78% (3658 out of 4690 possible),  
1145 and that determined by group effort is 22% (1143 out of 4690 possible). So,  
1146 although group effort is fundamentally important to the design of the course and to  
1147 the way in which labs and case studies are run, **your grade is determined**  
1148 **primarily by your individual scores; i.e., by your individual effort.** In short, you  
1149 are ultimately responsible for the majority of the grade points you earn in the  
1150 course. **The group work should help you *do better* by helping you learn the**  
1151 **material more thoroughly.**

1152  
1153 **Please note that The State of Texas REQUIRES that universities have students engage**  
1154 **in group activities because it is crucial to their career preparation. This is an**  
1155 **additional reason why group work is required and why you will evaluate one**  
1156 **another's contributions to the group.**

1157  
1158 All of the tests and assignments for the course, including lab assignments, are listed in the  
1159 **Grade Form on page 13.** To keep track of your grades, **you need to record each and**  
1160 **every grade you receive on this form.** (*Please note that Black Board will not calculate*  
1161 *your grade; it's simply a place to store the grades for individual assignments.*)

1162  
1163 Using the form below, you can *estimate* your grade at any point in the semester by  
1164 comparing the total number of points you have earned to-date to the total number of points

1165 possible at that point in the course. You can only estimate the grade because, prior to the  
1166 end of the semester, your score on group work will not be adjusted based on your peer  
1167 evaluations. ***However, you should have a very good sense of how you are doing based on***  
1168 ***the original, unadjusted group scores coupled with your awareness of your***  
1169 ***participation in the group.***

1170 Abbreviations used in grade form

1171

1172 Lecture component

Lab Component

1173

CS = Case Study

ILQ = Individual Lab

1174

Quiz

1175

RQ = Reading Quiz

GLQ = Group Lab Quiz

1176

SQ = Syllabus Quiz

1177

HW = Homework

1178

CT = Critical Thinking Test

1179

## Grade Record Form

1180  
1181  
1182  
1183  
1184  
1185  
1186  
1187  
1188  
1189  
1190  
1191  
1192  
1193  
1194  
1195  
1196  
1197  
1198  
1199  
1200  
1201  
1202  
1203  
1204  
1205  
1206  
1207  
1208  
1209  
1210  
1211  
1212  
1213  
1214  
1215  
1216  
1217  
1218  
1219  
1220  
1221  
1222  
1223  
1224

### I. Lecture Grades (75.7% of total)

#### Individual grades

##### 1. Test grades (48%)

Test 1 \_\_\_\_ (750)

Test 2 \_\_\_\_ (750)

Test 3 \_\_\_\_ (750)

**A. Total test = \_\_\_\_**

##### 2. Reading Quizzes (12.2%)

SQ 1 \_\_\_\_ (20)

RQ 1 \_\_\_\_ (60)

RQ 2 \_\_\_\_ (40)

RQ 3 \_\_\_\_ (60)

RQ 4 \_\_\_\_ (60)

RQ 5 \_\_\_\_ (60)

RQ 6 \_\_\_\_ (40)

EnvHW \_\_\_\_ (50)

RQ 7 \_\_\_\_ (60)

RQ 8 \_\_\_\_ (60)

RQ 9 \_\_\_\_ (60)

**B. Total Quiz = \_\_\_\_**

##### 3. Group Grades in Lecture (12.4%)

NASA CS \_\_\_\_ (60)

Xango CS \_\_\_\_ (60)

Argument HW \_\_\_\_ (90)

Water HW \_\_\_\_ (90)

Vacc/Autism CS \_\_\_\_ (60)

FiLCHeRS HW \_\_\_\_ (220)

Total group lecture = \_\_\_\_

**C. Total group x peer score = \_\_\_\_**

##### 4. Attendance (150 pts.) (3.1%)

-30 for each unexcused absence or tardy - after the first absence or tardy

**D. Total Attendance \_\_\_\_ (150 max. if no absences)**

##### 5. Extra Credit: Critical Thinking Assessment Scores (worth up to 9%)

CT pre-test \_\_\_\_ (120 max)

CT post-test \_\_\_\_ (120 max)

**E. Total CT points \_\_\_\_**

### II. Lab Scores (24.4% of total)

#### 1. Individual Lab Scores (14.8%)

ILQ 1 \_\_\_\_ (74)

ILQ 2 \_\_\_\_ (77)

ILQ 3 \_\_\_\_ (77)

ILQ 4 \_\_\_\_ (77)

ILQ 5 \_\_\_\_ (77)

ILQ 6 \_\_\_\_ (77)

ILQ 7 \_\_\_\_ (77)

ILQ 8 \_\_\_\_ (77)

ILQ 9 \_\_\_\_ (77)

ILQ 10 \_\_\_\_ (77)

**F. Total Individual \_\_\_\_ (Drop lowest ILQ)**

#### 2. Group lab Scores (9.6%)

GLQ 1 \_\_\_\_ (50)

GLQ 2 \_\_\_\_ (50)

GLQ 3 \_\_\_\_ (50)

GLQ 4 \_\_\_\_ (50)

GLQ 5 \_\_\_\_ (50)

GLQ 6 \_\_\_\_ (50)

GLQ 7 \_\_\_\_ (50)

GLQ 8 \_\_\_\_ (50)

GLQ 9 \_\_\_\_ (50)

GLQ 10 \_\_\_\_ (50)

Total group \_\_\_\_ (Drop lowest GLQ)

**G. Total group x peer score \_\_\_\_**

1225 **To obtain your final grade (percent), add the totals labeled A, B, C,**  
1226 **D, E, F and G, divide by 4690, and multiply by 100.**

1227 **Point range for final course grade**

1228

1229 A = 4221-4690 D = 2814-3282

1230 B = 3752-4220 F = less than 2814

1231 C = 3283-3751

1232

1233 **Academic Honesty:** All students are expected to engage in all academic pursuits in a  
1234 manner that is above reproach. Students are expected to maintain complete honesty and  
1235 integrity in academic experiences both in and out of the classroom. Any student found  
1236 guilty of dishonesty in any phase of academic work will be subject to disciplinary action that  
1237 is consistent with university policies. Please read the following:

1238

1239 1) Students are encouraged to study in groups to prepare for tests. However, “group  
1240 effort” is definitely not permitted when taking exams! This will result in an  
1241 automatic zero on a test. Two such occurrences will result in an F in the course.

1242

1243 **Proper Course Behavior:** All of these rules are standard and are based on common  
1244 courtesy, respect, and honesty – all of which are necessary to ensure a positive learning  
1245 environment.

1246

1247 1) Students will refrain from behavior in the classroom that intentionally or  
1248 unintentionally disrupts the learning process and, thus, impedes the mission of the  
1249 university. Cellular telephones, pagers and ALL other electronic communication  
1250 devices must be turned off before class begins.

1251

1252 Students are prohibited from eating or drinking in class, using tobacco products,  
1253 making offensive remarks, reading newspapers, sleeping, talking at inappropriate  
1254 times, wearing inappropriate clothing, or engaging in any other form of distraction.  
1255 Inappropriate behavior in the classroom will result in a directive to leave class.  
1256 Students who are especially disruptive also may be reported to the Dean of Students  
1257 for disciplinary action in accordance with university policy.

1258

1259 2) ***Please do not use cell phones or I-pods in class at any time, unless instructed to***  
1260 ***do so, because it distracts not only you, but the instructor and other students.*** If  
1261 you use a laptop computer or I-Pad, please use it only to access the lectures.

1262

1263 ***If you have an emergency-type situation that requires that you be in cell***  
1264 ***phone contact with someone (e.g., relative in hospital; spouse overseas in the***  
1265 ***military), then please tell me before class begins and put the phone in the***  
1266 ***vibrate mode.***

1267

1268 3) **Please come to class on time**—there is no reason to be late to class on a frequent  
1269 basis.

1270

1271 4) **Please remain in class until it is finished** because **leaving early disrupts the**  
1272 **class and will count as an absence unless you have cleared it with me, or**

1273                    **unless it is an emergency.** If you have a job that overlaps with class time, then you  
1274 need to drop the course or change your work schedule.

1275  
1276 5) Please remove hats during exams.

1277  
1278 6) **For obvious reasons, students CANNOT LEAVE THE ROOM DURNING AN**  
1279 **EXAM and then return.** If this happens, the test will be taken up and your grade  
1280 will be based on the portion of the test that you completed. **If you have a cold or**  
1281 **allergy, please bring tissues to class so that you won't want to leave to get**  
1282 **tissues during the test.**

1283  
1284 **Study Tips:** Please read and follow these tips to enhance your grade in the course. I want  
1285 you to do well!

1286  
1287 1. **This course deals with arguments and evidence for or against certain claims. So,**  
1288 **in order to study, you should imagine that you have been asked to write an essay**  
1289 **in which you must present evidence and arguments to either support or refute a**  
1290 **claim. This helps you learn and retain the material – and it makes the learning**  
1291 **process more fun and interesting. This approach amounts to pretending that you**  
1292 **are teaching the material to someone else.** You cannot simply memorize your notes  
1293 and definitions and expect to do well on the tests. You must truly understand the  
1294 material in order to obtain a good grade.

1295  
1296 2. **Take notes.** Although significant amount of the information covered in class is presented  
1297 in abbreviated form on the Power Point lectures, you will almost certainly need to write  
1298 additional notes in order to recall, integrate, and understand the information. In  
1299 addition, note taking requires active listening; i.e., a conscious attempt to determine what  
1300 is important and to look for connections between ideas. Lectures aren't simply a bunch  
1301 of facts and definitions thrown together. **In the class, the lectures are arguments**  
1302 **either for or against certain claims and you'll need to understand the arguments.**

1303  
1304 3. **Review your notes before the next class.** Constant reviewing will help you learn the  
1305 material in smaller 'bites' of information – which makes it much easier to learn. Just as  
1306 importantly, reviewing your notes before the next lecture will help you see how the  
1307 previous material connects with the material to be covered in the upcoming class.

1308  
1309 4. This course requires that students learn a significant amount of material on their own,  
1310 independent from the lecture material. Furthermore, the reading quizzes are based on  
1311 the reading material! **So, reading the textbooks and reader for this course really,**  
1312 **truly is a necessity. The ability to learn on your own is one of the most important**  
1313 **skills you will learn in college, and it is one of the most important skills that**  
1314 **employers look for in job candidates.**

1315  
1316 5. When it comes time to **review for an exam**, first read the highlighted portions of the text,  
1317 then concentrate on your notes. You might also want to follow the procedures below:

1318  
1319 a. As you review your notes, first concentrate on absorbing the key ideas and  
1320 understanding the organization of the material - why certain ideas followed others in  
1321 the class and how they are related.

1322



1323 b. Once this is done, begin to focus on the details - the “whys.” As stated above, **tests in**  
1324 **this course are absolutely not based on the mere memorization of definitions, or**  
1325 **on the recognition of verbatim statements from lecture**; rather, the test questions  
1326 assume you already know the definitions and that you understand the concepts  
1327 discussed in lecture. **So, you will not be asked definitions; rather you will be**  
1328 **asked to apply facts and principles, i.e., to think with the information you have**  
1329 **learned.** Of course, you have to know the definitions to begin the process of  
1330 answering questions; so, by all means, learn the definitions as the first step in learning  
1331 the material☺

1332  
1333 **Visitors in the Classroom:** Unannounced visitors to the classroom must present a current,  
1334 official SHSU identification card to be permitted in the classroom. They must not present a  
1335 disruption to the class by their attendance. If the visitor is not a registered student, it is at  
1336 the instructor's discretion whether or not the visitor will be allowed to remain in the  
1337 classroom. This policy is not intended to discourage occasional visiting of classes by  
1338 responsible persons.

1339  
1340 **Americans with Disabilities Act:** Any student seeking accommodations should go to the  
1341 **Counseling Center and Services for Students with Disabilities** at the very beginning of the  
1342 semester and complete a form that will grant permission to receive special  
1343 accommodations. Please do not wait until test day to do this – **the request for**  
1344 **accommodations must be done at the beginning of the semester and students that**  
1345 **have permission to use the services at the Counseling Center must make**  
1346 **appointments several days ahead of scheduled tests. Walk-ins aren't permitted.** Also,  
1347 please be sure to send me an e-mail two days before an exam to remind me to take the test  
1348 to the Counseling Center.

1349  
1350 **Religious Holy Days:** If a student desires to be excused from class, assignment, or a test on  
1351 a religious holy day, then the student must notify the instructor of each scheduled class that  
1352 he/she will be absent for religious reasons. In such cases, the student will be required to  
1353 take the test or submit the assignment early—unless there are good reasons for not being  
1354 able to do so and the instructor has agreed to those reasons.

1355  
1356 **Special Circumstances:** **If unusual circumstances arise during the semester, such as a**  
1357 **medical problem, death in the family, etc., which adversely affects your attendance PLEASE**  
1358 **discuss this with me immediately and provide documentation. Don't wait until the**  
1359 **end of the semester to discuss the problem with me.** If you keep me informed, I will  
1360 gladly do my best to accommodate your situation. However, please understand that,  
1361 because of the nature of the course, there are limits as to how much can be excused and so,  
1362 at some point, it may be necessary for you to drop the course. Also, if you wait until after-  
1363 the-fact, at the end of the semester, to let me know that you were experiencing these  
1364 adverse circumstances, there is nothing I can do about it at that time. I cannot retroactively  
1365 make accommodations and I do not give extra credit assignments to make up for grade  
1366 deficiencies.

1367  
1368 **SCHEDULE:** *\*This schedule is subject to change at any time based on class progress.*  
1369 Major lecture topics are listed in bold-face, black font.

1370  
1371 **Reading assignments are in green font and include**



1372  
1373  
1374  
1375  
1376  
1377  
1378  
1379  
1380  
1381  
1382  
1383  
1384  
1385  
1386  
1387  
1388  
1389  
1390  
1391  
1392  
1393  
1394  
1395  
1396  
1397  
1398  
1399  
1400  
1401  
1402  
1403  
1404  
1405  
1406  
1407  
1408  
1409  
1410  
1411  
1412  
1413  
1414  
1415  
1416

**all material covered since the preceding quiz**  
**Case studies are in blue font.**  
**Tests are in orange font.**  
**Reading Quizzes are in red font.**  
**Homework assignments are in purple font.**

*Please note that some of the readings include only sections of a chapter (indicated by the word "part"), whereas others include the entire chapter, indicated by the word "all". Please don't wait until the last minute to do the readings!*

- FOS = Foundations of Science (custom edition of the *Conceptual Integrated Science* textbook by Hewitt et al.
- Schick = *How to Think about Weird Things* by Schick and Vaughn

Lectures

Labs

|       |      |                                                                                                                                                                                                                         |                                        |
|-------|------|-------------------------------------------------------------------------------------------------------------------------------------------------------------------------------------------------------------------------|----------------------------------------|
| 1st   | 1/15 | Introduction to course: <b>Weird Things People Believe</b> and                                                                                                                                                          | <u>No</u>                              |
| lab   |      | <b>"Witch Trials of the Past and Present: Why Evidence and Reason Matter"</b>                                                                                                                                           |                                        |
|       |      | <b>Read FOS - Chapter 1 all: "About Science" pp. 1-14</b>                                                                                                                                                               |                                        |
|       |      | <b>Read Schick - Chapter 1 all: "Close Encounters With the Strange" pp. 1-13</b>                                                                                                                                        |                                        |
| ----- |      |                                                                                                                                                                                                                         |                                        |
| 2nd   | 1/20 | Complete Witch Trials and begin <b>Nature of Science</b>                                                                                                                                                                | <u>No lab</u>                          |
|       |      | <b>Read Schick Chapter 6: "Science and Its Pretenders" part 158-181 (nature of science &amp; scientific reasoning)</b>                                                                                                  |                                        |
|       |      | <b>Read Schick - Chapter 3: "Arguments Good, Bad and Weird" parts 33-39 and 49-57. (Pay particular attention to pages 49-55 dealing with informal fallacies. You will reference these <u>throughout the course</u>)</b> |                                        |
|       | 1/22 | Continue Nature of Science lecture                                                                                                                                                                                      |                                        |
|       |      | <b>Collect student information for creating groups</b>                                                                                                                                                                  |                                        |
|       |      | <b>Syllabus Quiz due</b>                                                                                                                                                                                                |                                        |
|       |      | <b>Reading Quiz 1 due</b>                                                                                                                                                                                               |                                        |
| ----- |      |                                                                                                                                                                                                                         |                                        |
| 3rd   | 1/27 | <b>NASA Activity</b>                                                                                                                                                                                                    | <u>Labs Begin &amp; Extra Credit -</u> |
|       | Pre  | <b>Read Schick Chapter 4:</b>                                                                                                                                                                                           |                                        |

|      |                 |      |                                                                         |                      |
|------|-----------------|------|-------------------------------------------------------------------------|----------------------|
| 1417 |                 |      | <b>"Knowledge, Belief and Evidence" parts 62-84 and</b>                 |                      |
| 1418 |                 |      | <b>summary on page 90 (opinion vs. knowledge and expertise)</b>         |                      |
| 1419 |                 |      | <i>Argument Homework assigned: due 2/19</i>                             |                      |
| 1420 |                 |      |                                                                         |                      |
| 1421 |                 | 1/29 | Nature of Science lecture                                               |                      |
| 1422 |                 |      | <b>"Why Things Aren't Always What They Seem to Be"</b>                  |                      |
| 1423 |                 |      | <b>Reading Quiz 2 due</b>                                               |                      |
| 1424 | -----           |      |                                                                         |                      |
| 1425 | 4 <sup>th</sup> | 2/3  | Begin lecture on the <b>Limits to Perception and Memory</b>             | <u>Checks Lab</u>    |
| 1426 |                 |      | <b>Read Schick Chapter 5: "Looking for Truth in</b>                     |                      |
| 1427 |                 |      | <b>Personal Experience" part 96-143 (perception and memory</b>          |                      |
| 1428 |                 |      | <b>problems)</b>                                                        |                      |
| 1429 |                 |      |                                                                         |                      |
| 1430 |                 | 2/5  | Continue Limits to Perception and Memory                                |                      |
| 1431 |                 |      | <b>Reading Quiz 3 due</b>                                               |                      |
| 1432 | -----           |      |                                                                         |                      |
| 1433 | 5 <sup>th</sup> | 2/10 | <i>Xango Case Study</i>                                                 | <u>Salem Lab</u>     |
| 1434 |                 |      | <b>Read FOS Chapter 2 all: "The Universe" pp. 15-34</b>                 |                      |
| 1435 |                 |      |                                                                         |                      |
| 1436 |                 | 2/12 | Continue Limits to Perception and Memory                                |                      |
| 1437 |                 |      | <b>Read FOS Chapter 3: "The Atom" 35-56</b>                             |                      |
| 1438 |                 |      | <b>Read FOS Chapter 4 "Energy and Momentum" 57-76</b>                   |                      |
| 1439 | -----           |      |                                                                         |                      |
| 1440 |                 |      |                                                                         |                      |
| 1441 | 6 <sup>th</sup> | 2/17 | Begin Astronomy 1 Lecture:                                              |                      |
| 1442 |                 |      | <u>Perception lab</u>                                                   |                      |
| 1443 |                 |      | <b>"What are those Lights in the Sky? Stars, Planets, Galaxies" and</b> |                      |
| 1444 |                 |      | <b>"The Size of the Universe"</b>                                       |                      |
| 1445 |                 |      | <b>Read Schick Chapter 7: "Case Studies in the</b>                      |                      |
| 1446 |                 |      | <b>Extraordinary" part 234-248 (UFO abductions)</b>                     |                      |
| 1447 |                 |      |                                                                         |                      |
| 1448 |                 | 2/19 | Continue Astronomy 1 lecture                                            |                      |
| 1449 |                 |      | <i>Argument Homework due</i>                                            |                      |
| 1450 | -----           |      |                                                                         |                      |
| 1451 | 7 <sup>th</sup> | 2/24 | <b>Test 1 (NOS &amp; LPM)</b>                                           | <u>Astrology Lab</u> |
| 1452 |                 |      | <b>Read Schick Chapter 4: "Knowledge, Belief and</b>                    |                      |
| 1453 |                 |      | <b>Evidence" part 84-90 (astrology section)</b>                         |                      |
| 1454 |                 |      | <b>Read FOS Chapter 5 "Heat" 77-98</b>                                  |                      |
| 1455 |                 |      |                                                                         |                      |
| 1456 |                 | 2/26 | Continue Astronomy 1 lecture                                            |                      |
| 1457 |                 |      | <b>Reading Quiz 4 due</b>                                               |                      |
| 1458 |                 |      | <b>Read the Laws and Relativity lecture posted on BB.</b>               |                      |
| 1459 |                 |      | <i>This information is critical to doing the Star</i>                   |                      |
| 1460 |                 |      | <i>Trek lab - especially the section on relativity.</i>                 |                      |
| 1461 | -----           |      |                                                                         |                      |
| 1462 | 8 <sup>th</sup> | 3/3  | Begin Astronomy 2 Lecture: <b>"The Big Bang and</b>                     | <u>Star Trek Lab</u> |

1463 the Nature of the Universe – or is it a Multiverse?”  
1464 Read FOS Chapter 6: "Describing Motion" 99-116  
1465 Read FOS Chapter 7: "Newton's Laws of Motion"  
1466 117-138  
1467  
1468 3/5 Complete Astronomy 2 lecture  
1469 "Ghost Busting with Newton's Laws"  
1470 Read Power Point lecture on Black Board titled "The  
1471 Paranormal – Part 1: History of Ghosts, Psychic  
1472 Energy, Psychic Powers, Psychic Detectives,  
1473 Psychic Healers and Mediums."  
1474 \*\*\*\*Mid-term peer evaluation due\*\*\*\*  
1475 -----  
1476 3/10 Spring Break  
1477 3/12 Spring Break  
1478 -----  
1479 9<sup>th</sup> 3/17 Begin Paranormal Phenomena – Part 2 lecture Haunting Lab  
1480 *AAW Water Homework assigned;*  
1481 *Part 1 (individual component) due 4/7*  
1482 *Part 2 (group component) due 4/14*  
1483 Read Schick Chapter 2 all: "The Possibility of the  
1484 Impossible" pp. 14-29 (the possibility of ESP and  
1485 precognition)  
1486 Read Schick Chapter 6: "Science and Its Pretenders"  
1487 part 197-213 (parapsychology)  
1488 Read Schick Chapter 7: "Case Studies in the  
1489 Extraordinary" parts 220-227 and 248-276  
1490 (talking to the dead, near-death experiences, and  
1491 ghosts)  
1492 3/19 Continue Paranormal Phenomena – Part 2 lecture  
1493 **Reading Quiz 5 due**  
1494 -----  
1495 10<sup>th</sup> 3/24 Begin CAM 1 lecture on "Complimentary, Alternative, CAM Lab  
1496 and Quack Medicines and Diets: take two ginkgo tablets  
1497 and some homeopathic elixir and you'll be fine!"  
1498 Read Schick Chapter 7 (homeopathy) part 227-231  
1499 Read Schick Chapter 7 (climate change) part 283-288  
1500  
1501 10<sup>th</sup> 3/26 **Test 2 (Astronomy, Laws, and Paranormal)**  
1502 Read Schick Chapter 5 "Looking for Truth in  
1503 Personal Experience" part 141-150 (anecdotal  
1504 evidence, placebo effects and controlled studies)  
1505 -----  
1506 11<sup>th</sup> 3/31 Continue CAM 1 lecture Geology lab  
1507 Read FOS Chapter 8: "Human Biology – Care and  
1508 Maintenance" 139-160

|      |                  |                                                                                |                          |
|------|------------------|--------------------------------------------------------------------------------|--------------------------|
| 1509 |                  |                                                                                |                          |
| 1510 | 4/2              | Begin CAM 2 lecture                                                            |                          |
| 1511 |                  | <b>Reading Quiz 6 due</b>                                                      |                          |
| 1512 |                  | <b>Read FOS Chapter 9: "Rocks and Minerals parts 161-184"</b>                  |                          |
| 1513 | -----            |                                                                                |                          |
| 1514 | 12 <sup>th</sup> | 4/7 Continue CAM 2 lecture                                                     | <u>Natural Selection</u> |
| 1515 | Lab              |                                                                                |                          |
| 1516 |                  | <b>Read FOS Chapter 10: "Plate Tectonics"</b>                                  |                          |
| 1517 |                  | <b>pp. 185-210</b>                                                             |                          |
| 1518 |                  | <b>Read FOS Chapter 11 all: "The Solar System"</b>                             |                          |
| 1519 |                  | <b>pp. 211-232</b>                                                             |                          |
| 1520 |                  | <i>Water Homework part 1 due</i>                                               |                          |
| 1521 |                  |                                                                                |                          |
| 1522 | 4/9              | <i>Vaccine-Autism Case Study</i>                                               |                          |
| 1523 |                  | <b>Reading Quiz 7 due</b>                                                      |                          |
| 1524 | -----            |                                                                                |                          |
| 1525 | 13 <sup>th</sup> | 4/14 <b>Atlantis and Crystal Power; What Rocks</b>                             | <u>Extra Credit -</u>    |
| 1526 | Post             |                                                                                |                          |
| 1527 |                  | <b>and Minerals Can and Can't Tell Us"</b>                                     |                          |
| 1528 |                  | Begin lecture on The Origin of Planet Earth (Geology)                          |                          |
| 1529 |                  | <i>Water Homework part 2 due</i>                                               |                          |
| 1530 |                  | <i>FiLCHeRS assigned; due 4/30 (no late work accepted)</i>                     |                          |
| 1531 |                  |                                                                                |                          |
| 1532 | 4/16             | Finish Geology lecture and                                                     |                          |
| 1533 |                  | begin <b>Cryptids</b> lecture - <b>"Legendary Creatures and a Discouraging</b> |                          |
| 1534 |                  | <b>Lack of Evidence: Nessie, Big Foot, and the Chupacabra!"</b>                |                          |
| 1535 |                  | <b>Read FOS Chapter 12: "The Basic Unit of Life - the</b>                      |                          |
| 1536 |                  | <b>Cell" pp. 233-260</b>                                                       |                          |
| 1537 |                  | <b>Read FOS Chapter 13 all: "Genetics" - pp. 261-286</b>                       |                          |
| 1538 |                  | <b>Read Schick Chapter 8 all: "Relativism, Truth and Reality"</b>              |                          |
| 1539 |                  | <b>-- pp. 295-315</b>                                                          |                          |
| 1540 | -----            |                                                                                |                          |
| 1541 | 14 <sup>th</sup> | 4/21 Finish Cryptid lecture and                                                | <u>Whale Lab</u>         |
| 1542 |                  | Begin lecture on genetics - <b>"Can Vulcans and Humans</b>                     |                          |
| 1543 |                  | <b>Make Babies? The Genetic Code of Life"</b>                                  |                          |
| 1544 |                  | <b>Reading Quiz 8 due</b>                                                      |                          |
| 1545 |                  |                                                                                |                          |
| 1546 |                  | <b>Read FOS Chapter 14 all: "Evolution" -- pp. 287-316</b>                     |                          |
| 1547 |                  | <b>Read Schick Chapter 6: "Science and Its Pretenders"</b>                     |                          |
| 1548 |                  | <b>part 181-197 (creationism)</b>                                              |                          |
| 1549 |                  |                                                                                |                          |
| 1550 | 4/23             | <b>Finish Genetics and begin Evolution</b>                                     |                          |
| 1551 |                  |                                                                                |                          |
| 1552 | 15 <sup>th</sup> | 4/28 Continue Evolution lecture                                                |                          |
| 1553 |                  | <b>Reading Quiz 9 due</b>                                                      |                          |
| 1554 |                  |                                                                                |                          |

1555  
1556  
1557  
1558  
1559  
1560  
1561  
1562  
1563  
1564  
1565  
1566  
1567  
1568  
1569  
1570  
1571  
1572  
1573  
1574  
1575  
1576

4/30 "There is Grandeur in this View: Evolutionary  
Theory as the Foundation of Biology: Scientific  
Synthesis and Consistency"

*Homework FiLChERS due*

*Peer evaluations due*

-----

**Final** – Covers material on Alternative Medicines and Diets, Geology, Cryptids and Principle of Ecology Power Point, Genetics, and Evolution and RQ 6 (dealing with Schick Chapter 5), RQ 7, and RQ 8, as well as the related lab material. It is *not* a comprehensive final exam, but you do need to know the logical fallacies and critical thinking tools used throughout the course.

**Final Exam Time: Tuesday, May 5<sup>th</sup> from 8:00-10:00 AM**

- **A summary list of all of the READING QUIZZES, their due dates, and the chapters they cover is provided on the next 2 pages.**

**A summary list of the group homework assignments is provided on the last page of this document.**

## Reading Quizzes for Spring Semester 2015

1577  
1578  
1579  
1580  
1581  
1582  
1583  
1584  
1585  
1586  
1587  
1588  
1589  
1590  
1591  
1592  
1593  
1594  
1595  
1596  
1597  
1598  
1599  
1600  
1601  
1602  
1603  
1604  
1605  
1606  
1607  
1608  
1609  
1610  
1611  
1612  
1613  
1614  
1615  
1616  
1617  
1618  
1619  
1620  
1621

*\* All quizzes are due by 5:00pm on their respective dates below. If you experience computer or submission trouble, please contact the helpdesk (936-294-2780). Once the assignment has opened, you may take the quiz as many times as you wish, until the time it is due.*

- Schick = *How to Think about Weird Things* by Schick and Vaughn
- FOS = *Foundations of Science* text. \* In addition to the new, custom *Foundations of Science* (FOS) page numbers, the earlier *Conceptual Integrated Science* (CIS) page numbers are also listed after the FOS page numbers in case you have the earlier edition. They are shown in green, italicized font.
- PowerPoint lectures on BB are in purple

### Quiz 1: Thursday 1/22

- 1) Schick – Chapter 1 **all**: “Close Encounters with the Strange” pp. 1-13
- 2) Read FOS - Chapter 1: “About Science” pp. 1-14  
(CIS – Chapter 1 **all**: “About Science” pp. 1-12)
- 3) Read Schick Chapter 6: “Science and Its Pretenders” **part** 158-181 (nature of science and scientific reasoning)
- 4) Read Schick – Chapter 3: “Arguments Good, Bad and Weird” **parts** 33-39 and 49-57. (Pay particular attention to pages 49-57 dealing with informal fallacies)

### Quiz 2: Thursday 1/29

- 1) Read Schick Chapter 4: “Knowledge, Belief and Evidence” **parts** 62-84 and summary on 90 (opinion vs. knowledge and expertise)

### Quiz 3: Thursday 2/5

- 1) Read Schick Chapter 5: “Looking for Truth in Personal Experience” **part** 96-143 (perception and memory problems)

### Quiz 4: Thursday 2/26

- 1) Read FOS Chapter 2: “The Universe” pp. 15-34  
(CIS Chapter 28: **all** “The Universe” pp. 649-666)
- 3) Read FOS Chapter 3: “The Atom” pp. 35-56  
(CIS Chapter 9: “The Atom” **part** 167-179)
- 4) Read FOS Chapter 4: “Energy and Momentum” pp. 57-76  
(CIS Chapter 4 on Energy **part** 63 -74)
- 5) Read Schick Chapter 4 Knowledge, Belief and Evidence” **part** 84-90 (astrology section)
- 6) Read Schick Chapter 7: Case Studies in the Extraordinary” **part** 234-248 (UFO abductions)
- 7) Read FOS Chapter 5: “Heat” pp. 77-98  
(CIS Chapter 6 “Heat” **part** 98-104)

1622  
1623  
1624  
1625  
1626  
1627  
1628  
1629  
1630  
1631  
1632  
1633  
1634  
1635  
1636  
1637  
1638  
1639  
1640  
1641  
1642

**Quiz 5: Thursday 3/19**

- ~1) Laws and Relativity lecture posted on BB. This information is critical to the Star Trek lab
- 2) Read FOS Chapter 6 "Describing Motion" pp. 99-116  
(CIS Chapter 2 **all**: "Describing Motion" pp. 17-30)
- 3) Read FOS Chapter 7: "Newton's Laws of Motion" pp. 117-138  
(CIS Chapter 3: "Newton's Laws of Motion" **part** 36-49)
- ~4) The Paranormal lecture posted on BB– Part 1: History of Ghosts, Psychic Energy, Psychic Powers, Psychic Detectives, Psychic Healers and Mediums."
- 5) Read Schick Chapter 2 **all**: "The Possibility of the Impossible" pp. 14-29 (the possibility of ESP and precognition)
- 6) Read Schick Chapter 6: "Science and Its Pretenders" **part** 197-213 (parapsychology)
- 7) Read Schick Chapter 7: "Case Studies in the Extraordinary" **parts** 220-227 and 248-276 (talking to the dead, near-death experiences, and ghosts)

**Quiz 6: Thursday 4/2**

- 1) Read Schick Chapter 7 (homeopathy) **part** 227-231
- 2) Read Schick Chapter 5 "Looking for Truth in Personal Experience" **part** 141-150 (anecdotal evidence, placebo effects and controlled studies)
- 3) Read FOS Chapter 8: Human Biology – Care and Maintenance" pp. 139-160  
(CIS Chapter 20: "Human Biology II – Care and Maintenance" **part** 461-463 and page 70 on the "Placebo Effect")

**ENV Homework: 4/2**

- 1) Read Schick Chapter 7 (climate change) part 283-288
- \* This assignment includes an analysis of claims regarding global climate change. The information for this will be included as part of the assignment.

**Quiz 7: Thursday 4/9**

- 1) Read FOS Chapter 9: "Rocks and Minerals" pp. 161-184  
(CIS Chapter 23: "Rocks and Minerals" **parts** 531-537 and 541-552)
- 2) Read FOS Chapter 10: "Plate Tectonics" pp. 185-210  
(CIS Chapter 22 **all**: "Plate Tectonics" pp. 505-526)
- 3) Read FOS Chapter 11: "The Solar System" pp. 211-232  
(CIS Chapter 27 **all**: "The Solar System" pp. 320-338)

**Quiz 8: Tuesday 4/21**

- 1) Read FOS Chapter 12: "The Basic Unit of Life – the Cell" – pp. 233-260  
(CIS Chapter 15: "The basic Unit of Life – the Cell" - **parts** 319-328 and 334-336 (cell reproduction))
- 2) Read FOS Chapter 13 all: "Genetics" – pp. 261-286  
(CIS Chapter 16 **all**: "Genetics" – pp. 348-368)

1667

1668 3) Read Schick Chapter 8 *all*: "Relativism, Truth and Reality" pp. 295-315

1669

1670

**Quiz 9: Tuesday 4/28**

1671 4) Read FOS Chapter 14 *all*: "Evolution" pp. 287-316

1672 (CIS Chapter 17 *all*: "Evolution" pp. 372-396)

1673 5) Read Schick Chapter 6: "Science and Its Pretenders" *part* 181-197 (creationism)

1674

1675

1676

1677

1678

1679

***Group Homework Assignments***

1680

1681

\* These are group assignments and descriptions of them will be provided at the time they are assigned.

1682

1683

1684

The argument assignment and the AAW Water Homework assignments require both individual and group effort. So, time must be allotted to coordinate work with the group members.

1685

1686

1687

1688

The FiLCHeRS homework assignment consists of both short answer and multiple choice questions. Some questions will require that you look up information on the Internet. For these questions, you will be asked to cite the web addresses of the sites you consulted to obtain the information.

1689

1690

1691

1692

**1. Argument HW** – assigned 1/27

1693

**- due 2/19**

1694

1695

**2. Water HW** – assigned 3/17

1696

**- Part 1 due 4/7**

1697

**- Part 2 due 4/14**

1698

1699

**4. FiLCHeRS HW**– assigned 4/14

1700

**- due 4/30**

1701

1702

1703
